# Supplementary material
Source: publisher site journal article supplement (https://www.dovepress.com/article/396530)
Supplement: Supplementary file 1 [file get_supplementary_file.php]

The analgesic efficacy of chest wall blocks for postoperative analgesia after video-assisted thoracoscopic surgeries: a systematic review and network meta-analysis- Supplementary files

Contents

[Supplementary Table 1: literature search summary 3](#_Toc127018790)

[**Embase** Session Results 5](#_Toc127018791)

[Supplementary Table 2: justification for the risk of bias assessment grading 11](#_Toc127018792)

[Supplementary Table 3: additional characteristics of included studies 23](#_Toc127018793)

[Pairwise heterogeneity analysis 31](#_Toc127018794)

[24-hour opioid requirement 32](#_Toc127018795)

[Network diagram for 24-hour opioid requirement comparisons 32](#_Toc127018796)

[Rankogram for 24-hour opioid requirement comparisons between the pain interventions 33](#_Toc127018797)

[SUCRA graph for 24-hour opioid requirement comparisons between the pain interventions 33](#_Toc127018798)

[Funnel plot for 24-hour opioid requirement comparisons 34](#_Toc127018799)

[Leverage plot for 24-hour opioid requirement comparisons 34](#_Toc127018800)

[Consistency plot for 24-hour opioid requirement comparisons 34](#_Toc127018801)

[Sensitivity analysis excluding the study by Yeap et al 35](#_Toc127018802)

[Sensitivity analysis excluding studies that used surgical site infiltration as control 38](#_Toc127018803)

[Sensitivity analysis excluding studies with high risk of bias 39](#_Toc127018804)

[Sensitivity analysis excluding studies with inadequate patient blinding 41](#_Toc127018805)

[Subgroup analysis of studies with vs without chest tube 42](#_Toc127018806)

[24-hour static pain score AUC 43](#_Toc127018807)

[Network diagram for 24-hour pain score AUC comparisons 43](#_Toc127018808)

[Rankogram for 24-hour pain score comparisons between the pain interventions 44](#_Toc127018809)

[SUCRA graph for 24-hour pain score comparisons between the pain interventions 44](#_Toc127018810)

[Funnel plot for 24-hour pain score comparisons 45](#_Toc127018811)

[Leverage plot for 24-hour pain score comparisons 45](#_Toc127018812)

[Consistency plot for 24-hour pain score comparisons 46](#_Toc127018813)

[Sensitivity analysis excluding studies that used surgical site infiltration as control 47](#_Toc127018814)

[Sensitivity analysis excluding studies with inadequate patient blinding 48](#_Toc127018815)

[Sensitivity analysis excluding studies with high risk of bias 50](#_Toc127018816)

[Subgroup analysis of studies with vs without chest tube 51](#_Toc127018817)

[24-hour dynamic pain score AUC 52](#_Toc127018818)

[Network diagram for 24-hour dynamic pain score AUC comparisons 52](#_Toc127018819)

[Forest plot for 24-hour dynamic pain score comparisons between the pain interventions 53](#_Toc127018820)

[League table for 24-hour dynamic pain score comparisons between the pain interventions 53](#_Toc127018821)

[Rankogram for 24-hour dynamic pain score comparisons between the pain interventions 54](#_Toc127018822)

[SUCRA graph for 24-hour dynamic pain score comparisons between the pain interventions 54](#_Toc127018823)

[Funnel plot for 24-hour dynamic pain score comparisons 55](#_Toc127018824)

[Leverage plot for 24-hour dynamic pain score comparisons 55](#_Toc127018825)

[Consistency plot for 24-hour dynamic pain score comparisons 56](#_Toc127018826)

[Postoperative nausea and vomiting (PONV) risk 56](#_Toc127018827)

[Forest plot for PONV comparisons between the pain interventions 56](#_Toc127018828)

[Network diagram for PONV comparisons 57](#_Toc127018829)

[Rankogram for PONV comparisons between the pain interventions 57](#_Toc127018830)

[SUCRA graph for PONV comparisons between the pain interventions 57](#_Toc127018831)

[League table of PONV comparisons between the pain interventions 58](#_Toc127018832)

[Consistency plot for PONV comparisons between the pain interventions 59](#_Toc127018833)

[Leverage plot for PONV 59](#_Toc127018834)

[Length of stay 60](#_Toc127018835)

[Network diagram for length of stay comparisons 60](#_Toc127018836)

[Forest plot for length of stay comparisons between the pain interventions 61](#_Toc127018837)

[SUCRA graph for length of stay comparisons between the pain interventions 62](#_Toc127018838)

[League table for length of stay comparisons between the pain interventions 62](#_Toc127018839)

# Supplementary Table 1: literature search summary

**Ovid MEDLINE**(R) and Epub Ahead of Print, In-Process, In-Data-Review & Other Non-Indexed Citations and Daily <1946 to August 19, 2022>

1 exp Thoracic Surgery, Video-Assisted/ 8315

2 VATS.mp. [mp=title, book title, abstract, original title, name of substance word, subject heading word, floating sub-heading word, keyword heading word, organism supplementary concept word, protocol supplementary concept word, rare disease supplementary concept word, unique identifier, synonyms] 6527

3 video-assisted thoracic surgery.mp. [mp=title, book title, abstract, original title, name of substance word, subject heading word, floating sub-heading word, keyword heading word, organism supplementary concept word, protocol supplementary concept word, rare disease supplementary concept word, unique identifier, synonyms] 3360

4 exp Thoracoscopy/ 16110

5 1 or 2 or 3 or 4 19618

6 regional anesthesia.mp. [mp=title, book title, abstract, original title, name of substance word, subject heading word, floating sub-heading word, keyword heading word, organism supplementary concept word, protocol supplementary concept word, rare disease supplementary concept word, unique identifier, synonyms] 7512

7 exp Anesthesia, Conduction/ 70300

8 nerve block.mp. [mp=title, book title, abstract, original title, name of substance word, subject heading word, floating sub-heading word, keyword heading word, organism supplementary concept word, protocol supplementary concept word, rare disease supplementary concept word, unique identifier, synonyms] 28391

9 exp Nerve Block/ 25314

10 neurolysis.mp. [mp=title, book title, abstract, original title, name of substance word, subject heading word, floating sub-heading word, keyword heading word, organism supplementary concept word, protocol supplementary concept word, rare disease supplementary concept word, unique identifier, synonyms] 2545

11 transverse thoracic plane block.mp. [mp=title, book title, abstract, original title, name of substance word, subject heading word, floating sub-heading word, keyword heading word, organism supplementary concept word, protocol supplementary concept word, rare disease supplementary concept word, unique identifier, synonyms] 1

12 epidural anesthesia.mp. [mp=title, book title, abstract, original title, name of substance word, subject heading word, floating sub-heading word, keyword heading word, organism supplementary concept word, protocol supplementary concept word, rare disease supplementary concept word, unique identifier, synonyms] 6777

13 exp Anesthesia, Epidural/ 14043

14 PECs.mp. [mp=title, book title, abstract, original title, name of substance word, subject heading word, floating sub-heading word, keyword heading word, organism supplementary concept word, protocol supplementary concept word, rare disease supplementary concept word, unique identifier, synonyms] 1896

15 pectoral block.mp. [mp=title, book title, abstract, original title, name of substance word, subject heading word, floating sub-heading word, keyword heading word, organism supplementary concept word, protocol supplementary concept word, rare disease supplementary concept word, unique identifier, synonyms] 20

16 pectoralis block.mp. [mp=title, book title, abstract, original title, name of substance word, subject heading word, floating sub-heading word, keyword heading word, organism supplementary concept word, protocol supplementary concept word, rare disease supplementary concept word, unique identifier, synonyms] 9

17 serratus anterior block.mp. [mp=title, book title, abstract, original title, name of substance word, subject heading word, floating sub-heading word, keyword heading word, organism supplementary concept word, protocol supplementary concept word, rare disease supplementary concept word, unique identifier, synonyms] 17

18 SAM block.mp. [mp=title, book title, abstract, original title, name of substance word, subject heading word, floating sub-heading word, keyword heading word, organism supplementary concept word, protocol supplementary concept word, rare disease supplementary concept word, unique identifier, synonyms] 1

19 serratus anterior plane block.mp. [mp=title, book title, abstract, original title, name of substance word, subject heading word, floating sub-heading word, keyword heading word, organism supplementary concept word, protocol supplementary concept word, rare disease supplementary concept word, unique identifier, synonyms] 196

20 paravertebral block.mp. [mp=title, book title, abstract, original title, name of substance word, subject heading word, floating sub-heading word, keyword heading word, organism supplementary concept word, protocol supplementary concept word, rare disease supplementary concept word, unique identifier, synonyms] 1006

21 PVB.mp. [mp=title, book title, abstract, original title, name of substance word, subject heading word, floating sub-heading word, keyword heading word, organism supplementary concept word, protocol supplementary concept word, rare disease supplementary concept word, unique identifier, synonyms] 1146

22 TPVB.mp. [mp=title, book title, abstract, original title, name of substance word, subject heading word, floating sub-heading word, keyword heading word, organism supplementary concept word, protocol supplementary concept word, rare disease supplementary concept word, unique identifier, synonyms] 172

23 erector spinae block.mp. [mp=title, book title, abstract, original title, name of substance word, subject heading word, floating sub-heading word, keyword heading word, organism supplementary concept word, protocol supplementary concept word, rare disease supplementary concept word, unique identifier, synonyms] 108

24 ESB.mp. [mp=title, book title, abstract, original title, name of substance word, subject heading word, floating sub-heading word, keyword heading word, organism supplementary concept word, protocol supplementary concept word, rare disease supplementary concept word, unique identifier, synonyms] 523

25 ESP.mp. [mp=title, book title, abstract, original title, name of substance word, subject heading word, floating sub-heading word, keyword heading word, organism supplementary concept word, protocol supplementary concept word, rare disease supplementary concept word, unique identifier, synonyms] 3877

26 erector spinae plane block.mp. [mp=title, book title, abstract, original title, name of substance word, subject heading word, floating sub-heading word, keyword heading word, organism supplementary concept word, protocol supplementary concept word, rare disease supplementary concept word, unique identifier, synonyms] 868

27 intercostal block.mp. [mp=title, book title, abstract, original title, name of substance word, subject heading word, floating sub-heading word, keyword heading word, organism supplementary concept word, protocol supplementary concept word, rare disease supplementary concept word, unique identifier, synonyms] 158

28 6 or 7 or 8 or 9 or 10 or 11 or 12 or 13 or 14 or 15 or 16 or 17 or 18 or 19 or 20 or 21 or 22 or 23 or 24 or 25 or 26 or 27 87855

29 5 and 28 574

Search Name: **Cochrane Central Register of Controlled Trials (CENTRAL)**

Date Run: 22/08/2022 22:27:21

Comment:

ID Search Hits

#1 MeSH descriptor: [Thoracic Surgery, Video-Assisted] explode all trees 314

#2 MeSH descriptor: [Thoracoscopy] explode all trees 499

#3 ("video assisted thoracic surgery"):ti,ab,kw 300

#4 (VATS):ti,ab,kw 790

#5 #1 or #2 or #3 or #4 1212

#6 ("regional anesthesia"):ti,ab,kw 3639

#7 MeSH descriptor: [Anesthesia, Conduction] explode all trees 10601

#8 (nerve block):ti,ab,kw 12505

#9 MeSH descriptor: [Nerve Block] explode all trees 4624

#10 (neurolysis):ti,ab,kw 222

#11 (transverse thoracic plane block):ti,ab,kw 118

#12 (epidural anesthesia):ti,ab,kw 7928

#13 MeSH descriptor: [Anesthesia, Epidural] explode all trees 2039

#14 (PECs block):ti,ab,kw 271

#15 (pectoral block):ti,ab,kw 290

#16 (pectoralis block):ti,ab,kw 183

#17 (serratus anterior block):ti,ab,kw 361

#18 (SAM block):ti,ab,kw 48

#19 (serratus anterior plane block):ti,ab,kw 318

#20 (paravertebral block):ti,ab,kw 1256

#21 (PVB):ti,ab,kw 367

#22 (TPVB):ti,ab,kw 188

#23 (erector spinae block):ti,ab,kw 1024

#24 (ESB):ti,ab,kw 54

#25 (ESP):ti,ab,kw 580

#26 (erector spinae plane block):ti,ab,kw 923

#27 (intercostal block):ti,ab,kw 663

#28 #6 or #7 or #8 or #9 or #10 or #11 or #12 or #13 or #14 or #15 or #16 or #17 or #18 or #19 or #20 or #21 or #22 or #23 or #24 or #25 or #26 or #27 26766

#29 #5 AND #28 316

**Embase** Session Results

**No.**

**Query**

**Results**

**1,084**

**#29**

**#5** AND **#28**

**244,961**

**#28**

**#6** OR **#7** OR **#8** OR **#9** OR **#10** OR **#11** OR **#12** OR **#13** OR **#14** OR **#15** OR **#16** OR **#17** OR **#18** OR **#19** OR **#20** OR **#21** OR **#22** OR **#23** OR **#24** OR **#25** OR **#26** OR **#27**

**255**

**#27**

**'intercostal block'**

**1,120**

**#26**

**'erector spinae plane block'**

**132,752**

**#25**

**'esp'**

**1,742**

**#24**

**'esb'**

**177**

**#23**

**'erector spinae block'**

**251**

**#22**

**'tpvb'**

**2,412**

**#21**

**'pvb'**

**1,710**

**#20**

**'paravertebral block'**

**288**

**#19**

**'serratus anterior plane block'**

**2**

**#18**

**'sam block'**

**36**

**#17**

**'serratus anterior block'**

**20**

**#16**

**'pectoralis block'**

**34**

**#15**

**'pectoral block'**

**162**

**#14**

**'pecs block'**

**35,138**

**#13**

**'epidural anesthesia'**/exp

**35,264**

**#12**

**'epidural anesthesia'**

**2**

**#11**

**'transverse thoracic plane block'**

**4,912**

**#10**

**'neurolysis'**

**47,245**

**#9**

**'nerve block'**/exp

**41,509**

**#8**

**'nerve block'**

**65,669**

**#7**

**'regional anesthesia'**/exp

**36,157**

**#6**

**'regional anesthesia'**

**35,233**

**#5**

**#1** OR **#2** OR **#3** OR **#4**

**16,366**

**#4**

**'thoracoscopy'**/exp

**11,537**

**#3**

**'vats'**

**15,371**

**#2**

**'video assisted thoracoscopic surgery'**/exp

**4,158**

**#1**

**'video-assisted thoracic surgery'**

[
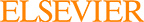
](https://www-elsevier-com.proxy.library.stonybrook.edu/)

**© 2022 RELX Intellectual Properties SA. All rights reserved.**

Embase, RELX Group and the RE symbol are trade marks of RELX Intellectual Properties SA, used under license.

# Query Limiters/Expanders Last Run Via Results

S30 (S5 AND S29) Expanders - Apply equivalent subjects

Search modes - Boolean/Phrase Interface - EBSCOhost Research Databases

Search Screen - Advanced Search

Database - **CINAHL Plus with Full Text** 83

S29 (S6 OR S7 OR S8 OR S9 OR S10 OR S11 OR S12 OR S13 OR S14 OR S15 OR S16 OR S17 OR S18 OR S19 OR S20 OR S21 OR S22 OR S23 OR S24 OR S25 OR S26 OR S27 OR S28) Expanders - Apply equivalent subjects

Search modes - Boolean/Phrase Interface - EBSCOhost Research Databases

Search Screen - Advanced Search

Database - CINAHL Plus with Full Text 18,768

S28 "intercostal block" Expanders - Apply equivalent subjects

Search modes - Boolean/Phrase Interface - EBSCOhost Research Databases

Search Screen - Advanced Search

Database - CINAHL Plus with Full Text 40

S27 "erector spinae plane block" Expanders - Apply equivalent subjects

Search modes - Boolean/Phrase Interface - EBSCOhost Research Databases

Search Screen - Advanced Search

Database - CINAHL Plus with Full Text 412

S26 "ESP" Expanders - Apply equivalent subjects

Search modes - Boolean/Phrase Interface - EBSCOhost Research Databases

Search Screen - Advanced Search

Database - CINAHL Plus with Full Text 700

S25 "ESB" Expanders - Apply equivalent subjects

Search modes - Boolean/Phrase Interface - EBSCOhost Research Databases

Search Screen - Advanced Search

Database - CINAHL Plus with Full Text 93

S24 "erector spinae block" Expanders - Apply equivalent subjects

Search modes - Boolean/Phrase Interface - EBSCOhost Research Databases

Search Screen - Advanced Search

Database - CINAHL Plus with Full Text 37

S23 "TPVB" Expanders - Apply equivalent subjects

Search modes - Boolean/Phrase Interface - EBSCOhost Research Databases

Search Screen - Advanced Search

Database - CINAHL Plus with Full Text 42

S22 "PVB" Expanders - Apply equivalent subjects

Search modes - Boolean/Phrase Interface - EBSCOhost Research Databases

Search Screen - Advanced Search

Database - CINAHL Plus with Full Text 109

S21 "paravertebral block" Expanders - Apply equivalent subjects

Search modes - Boolean/Phrase Interface - EBSCOhost Research Databases

Search Screen - Advanced Search

Database - CINAHL Plus with Full Text 354

S20 "serratus anterior plane block" Expanders - Apply equivalent subjects

Search modes - Boolean/Phrase Interface - EBSCOhost Research Databases

Search Screen - Advanced Search

Database - CINAHL Plus with Full Text 65

S19 "SAM block" Expanders - Apply equivalent subjects

Search modes - SmartText Searching Interface - EBSCOhost Research Databases

Search Screen - Advanced Search

Database - CINAHL Plus with Full Text 76

S18 "SAM block" Expanders - Apply equivalent subjects

Search modes - Boolean/Phrase Interface - EBSCOhost Research Databases

Search Screen - Advanced Search

Database - CINAHL Plus with Full Text 0

S17 "serratus anterior block" Expanders - Apply equivalent subjects

Search modes - Boolean/Phrase Interface - EBSCOhost Research Databases

Search Screen - Advanced Search

Database - CINAHL Plus with Full Text 5

S16 "pectoralis block" Expanders - Apply equivalent subjects

Search modes - Boolean/Phrase Interface - EBSCOhost Research Databases

Search Screen - Advanced Search

Database - CINAHL Plus with Full Text 1

S15 "pectoral block" Expanders - Apply equivalent subjects

Search modes - Boolean/Phrase Interface - EBSCOhost Research Databases

Search Screen - Advanced Search

Database - CINAHL Plus with Full Text 7

S14 "PECs block" Expanders - Apply equivalent subjects

Search modes - Boolean/Phrase Interface - EBSCOhost Research Databases

Search Screen - Advanced Search

Database - CINAHL Plus with Full Text 37

S13 (MH "Anesthesia, Epidural") Expanders - Apply equivalent subjects

Search modes - Boolean/Phrase Interface - EBSCOhost Research Databases

Search Screen - Advanced Search

Database - CINAHL Plus with Full Text 3,731

S12 "epidural anesthesia" Expanders - Apply equivalent subjects

Search modes - Boolean/Phrase Interface - EBSCOhost Research Databases

Search Screen - Advanced Search

Database - CINAHL Plus with Full Text 3,361

S11 "transverse thoracic plane block" Expanders - Apply equivalent subjects

Search modes - Boolean/Phrase Interface - EBSCOhost Research Databases

Search Screen - Advanced Search

Database - CINAHL Plus with Full Text 1

S10 "neurolysis" Expanders - Apply equivalent subjects

Search modes - Boolean/Phrase Interface - EBSCOhost Research Databases

Search Screen - Advanced Search

Database - CINAHL Plus with Full Text 529

S9 (MH "Nerve Block") Expanders - Apply equivalent subjects

Search modes - Boolean/Phrase Interface - EBSCOhost Research Databases

Search Screen - Advanced Search

Database - CINAHL Plus with Full Text 10,086

S8 "nerve block" Expanders - Apply equivalent subjects

Search modes - Boolean/Phrase Interface - EBSCOhost Research Databases

Search Screen - Advanced Search

Database - CINAHL Plus with Full Text 10,965

S7 (MH "Anesthesia, Conduction") Expanders - Apply equivalent subjects

Search modes - Boolean/Phrase Interface - EBSCOhost Research Databases

Search Screen - Advanced Search

Database - CINAHL Plus with Full Text 2,644

S6 "regional anesthesia" Expanders - Apply equivalent subjects

Search modes - Boolean/Phrase Interface - EBSCOhost Research Databases

Search Screen - Advanced Search

Database - CINAHL Plus with Full Text 3,192

S5 (S1 OR S2 OR S3 OR S4) Expanders - Apply equivalent subjects

Search modes - Boolean/Phrase Interface - EBSCOhost Research Databases

Search Screen - Advanced Search

Database - CINAHL Plus with Full Text 3,189

S4 (MH "Thoracoscopy") Expanders - Apply equivalent subjects

Search modes - Boolean/Phrase Interface - EBSCOhost Research Databases

Search Screen - Advanced Search

Database - CINAHL Plus with Full Text 1,682

S3 "VATS" Expanders - Apply equivalent subjects

Search modes - Boolean/Phrase Interface - EBSCOhost Research Databases

Search Screen - Advanced Search

Database - CINAHL Plus with Full Text 1,368

S2 (MH "Thoracic Surgery, Video-Assisted") Expanders - Apply equivalent subjects

Search modes - Boolean/Phrase Interface - EBSCOhost Research Databases

Search Screen - Advanced Search

Database - CINAHL Plus with Full Text 503

S1 video-assisted thoracic surgery Expanders - Apply equivalent subjects

Search modes - Boolean/Phrase Interface - EBSCOhost Research Databases

Search Screen - Advanced Search

Database - CINAHL Plus with Full Text 865

# Web of Science Search Strategy (v0.1)

# Database: **Web of Science Core Collection**

# Entitlements:

- WOS.SSCI: 1956 to 2022

- WOS.AHCI: 1975 to 2022

- WOS.CCR: 1985 to 2022

- WOS.BHCI: 2005 to 2022

- WOS.ISTP: 1991 to 2022

- WOS.ESCI: 2017 to 2022

- WOS.SCI: 1900 to 2022

- WOS.BSCI: 2005 to 2022

- WOS.ISSHP: 1991 to 2022

- WOS.IC: 1993 to 2022

# Searches:

2: video-assisted thoracic surgery (All Fields) OR thoracic surgery, video-assisted (All Fields) OR VATS (All Fields) OR thoracoscopy (All Fields) Date run: Tue Aug 23 2022 14:31:31 GMT-0400 (Eastern Daylight Time) Results: 25715

3: (((((((((((((((((((ALL=(regional anesthesia )) OR ALL=(anesthesia, conduction)) OR ALL=(nerve block)) OR ALL=(neurolysis)) OR ALL=(transverse thoracic plane block)) OR ALL=(epidural anesthesia)) OR ALL=(PECs block)) OR ALL=(pectoral block)) OR ALL=(Pectoralis block)) OR ALL=(serratus anterior block)) OR ALL=(SAM block)) OR ALL=(serratus anterior plane block)) OR ALL=(paravertebral block)) OR ALL=(PVB)) OR ALL=(TPVB)) OR ALL=(erector spinae block)) OR ALL=(ESB)) OR ALL=(ESP)) OR ALL=(erector spinae plane block)) OR ALL=(intercostal block) Date run: Tue Aug 23 2022 14:39:51 GMT-0400 (Eastern Daylight Time) Results: 165537

4: #2 AND #3 Date run: Tue Aug 23 2022 14:40:29 GMT-0400 (Eastern Daylight Time) Results: 560

# Supplementary Table 2: justification for the risk of bias assessment grading

| **Kang 202028** | | |
| --- | --- | --- |
| **Domain** | **Risk of bias** | **Justification** |
| Randomization process | Some concerns | No description of allocation concealment, no group imbalance |
| Deviation from intended intervention | Low risk | Patient not blinded, personnel blinding unclear, however no protocol deviation reported |
| Missing Outcome data | High risk | 16% data missing, mostly GA group |
| Measurement of outcome | Some concerns | Unclear of assessor blinding |
| Selection of reported results | Low risk | Registered, ChiCTR1900026213 |
| Overall | High risk |  |
|  |  |  |
| **Fu 202126** | | |
| **Domain** | **Risk of bias** | **Justification** |
| Randomization process | Some concerns | no concealment |
| Deviation from intended intervention | Low risk | patients and investigator blinded, unclear if healthcare team blinded, no protocol deviation reported |
| Missing Outcome data | High risk | 10% data missing |
| Measurement of outcome | Low risk | assessors blinded |
| Selection of reported results | Low risk | Registered, ChiCTR1900023205 |
| Overall | High risk |  |
|  |  |  |
| **Ding 201823** | | |
| **Domain** | **Risk of bias** | **Justification** |
| Randomization process | Some concerns | Not concealed, no other problems |
| Deviation from intended intervention | Low risk | participants aware, no protocol deviation reported |
| Missing Outcome data | Some Concerns | 6 patients excluded: 5.8% missing outcome data |
| Measurement of outcome | Some Concerns | Methods of measure appropriate, did not differ, no mentioned of assessor blinding, unlikely to be influenced |
| Selection of reported results | Low Risk | Trial registered Researchregistry3729. |
| Overall | High risk | 3 "Some Concern" |
|  |  |  |
| **Park 201835** | | |
| **Domain** | **Risk of bias** | **Justification** |
| Randomization process | Low risk | Concealed, computerized |
| Deviation from intended intervention | Low risk | Patients aware, no deviations |
| Missing Outcome data | Some risk | 5.6% missing outcome data |
| Measurement of outcome | Some risk | Patients were not blinded; assessors blinded |
| Selection of reported results | Some risk | No multiple outcome measures, not Registered |
| Overall | High risk |  |
|  |  |  |
| **Kim 200930** | | |
| **Domain** | **Risk of bias** | **Justification** |
| Randomization process | Some concerns | Computerized, but not concealed |
| Deviation from intended intervention | Low risk | Participants aware, no protocol deviation reported |
| Missing Outcome data | High risk | 37/52 completed. 29% data missing |
| Measurement of outcome | Some concerns | Appropriate method, didn’t differ between groups, assessors aware, assessment might have been influenced |
| Selection of reported results | Some concerns | Not registered |
| Overall | High risk |  |
|  |  |  |
|  |  |  |
| **Ekinci 202024** | | |
| **Domain** | **Risk of bias** | **Justification** |
| Randomization process | Low risk | Concealed with envelopes |
| Deviation from intended intervention | Low risk | Participants aware, no protocol deviation reported |
| Missing Outcome data | Low risk | No missing data |
| Measurement of outcome | Some concerns | Patients were aware of intervention, Some bias of assessment |
| Selection of reported results | Low risk | Registered NCT03960762 |
| Overall | Some risk |  |
|  |  |  |
| **Kaya 200629** | | |
| **Domain** | **Risk of bias** |  |
| Randomization process | Low risk | Participants, investigators, accessor were all blinded |
| Deviation from intended intervention | Low risk | Participant/personell unaware |
| Missing Outcome data | Some concerns | 47/50 completed, 6% data missing |
| Measurement of outcome | Low risk | Appropriate method, didn’t differ between groups, assessors unaware |
| Selection of reported results | Some concerns | Not registered |
| Overall | Some concerns |  |
|  |  |  |
| **Luo 202133** | | |
| **Domain** | **Risk of bias** |  |
| Randomization process | Low risk | Participants, investigators, accessor were blinded |
| Deviation from intended intervention | Low risk | Participant and assessors were both unaware |
| Missing Outcome data | Low risk | 40/42 completed, 5% data missing |
| Measurement of outcome | Low risk | Appropriate method, didn’t differ between groups, assessors unaware |
| Selection of reported results | Some concerns | not Registered |
| Overall | Some concerns |  |
|  |  |  |
|  |  |  |
| **Yeap 202046** | | |
| **Domain** | **Risk of bias** |  |
| Randomization process | Low risk | Randomly assorted into groups |
| Deviation from intended intervention | Some concerns | participants knew about block and personnel in study probably knew, no information about whether it caused deviations |
| Missing Outcome data | Low risk | Data for all patients |
| Measurement of outcome | Some concern | Appropriate method, didn’t differ between groups, assessors aware, assessment might have been influenced |
| Selection of reported results | Some concerns | Not registered |
| Overall | High risk |  |
|  |  |  |
| **Ahmed 201712** | | |
| **Domain** | **Risk of bias** |  |
| Randomization process | Low Risk | Randomly assorted into groups participants and personnel blinded |
| Deviation from intended intervention | Low risk | Patients were blinded, investigators in PACU were unaware |
| Missing Outcome data | Low risk | Data for all patients |
| Measurement of outcome | Low risk | Patients and assessors blinded |
| Selection of reported results | Some concerns | Not registered |
| Overall | Some Concern |  |
|  |  |  |
| **Lee 202032** | | |
| **Domain** | **Risk of bias** |  |
| Randomization process | Low Risk | Randomly assorted into groups participants and personnel blinded |
| Deviation from intended intervention | Low risk | Patients, personnel, and accessors blinded |
| Missing Outcome data | Some concerns | 4/50 patients missing data, 8% data missing |
| Measurement of outcome | Low risk | Patients and assessors blinded |
| Selection of reported results | Low risk | Registered: NCT04250272 |
| Overall | Some concerns |  |
|  |  |  |
| **Viti 202043** | | |
| **Domain** | **Risk of bias** |  |
| Randomization process | Low risk | Allocation sequence concealed and random |
| Deviation from intended intervention | Low risk | Participants unaware (single shot bock preformed after induction); assessors unaware |
| Missing Outcome data | Low risk | 90/94 completed data, 4.3% missing data |
| Measurement of outcome | Low risk | Appropriate method, didn’t differ between groups, assessors unaware |
| Selection of reported results | Low risk | Registered: NCT03134729. |
| Overall | Low risk |  |
|  |  |  |
| **Vogt 200544** | | |
| **Domain** | **Risk of bias** |  |
| Randomization process | Low risk | Allocation sequence concealed and random |
| Deviation from intended intervention | Low risk | participants unaware (single-shot block preformed after induction) |
| Missing Outcome data | High risk | 40/45 completed. 11% data missing |
| Measurement of outcome | Low risk | Appropriate method, didn’t differ between groups, assessors unaware, and patients unlikely to be aware 2/2 sham manipulation |
| Selection of reported results | Some concerns | Not registered |
| Overall | High risk |  |
|  |  |  |
| **Zhao 202053** | | |
| **Domain** | **Risk of bias** |  |
| Randomization process | Low risk | Allocation sequence concealed and random |
| Deviation from intended intervention | Low risk | Patients, anesthesiologists, study coordinator, data collection, and residents were all unaware |
| Missing Outcome data | Low risk | 66/66 completed the study. 0% missing data |
| Measurement of outcome | Low risk | Appropriate method, didn’t differ between groups, assessors and patients were unaware |
| Selection of reported results | Low risk | Registered: ChiCTR1900020875 |
| Overall | Low risk |  |
|  |  |  |
| **Chen 202017** | | |
| **Domain** | **Risk of bias** |  |
| Randomization process | Low risk | Allocation sequence concealed and random |
| Deviation from intended intervention | Low risk | All patients and investigators were blinded |
| Missing Outcome data | Low risk | 72/75 completed the study. 4% missing data |
| Measurement of outcome | Low risk | Appropriate method, didn’t differ between groups, assessors and patients were unaware of intervention |
| Selection of reported results | Low risk | Registered: ChiCTR1800018672 |
| Overall | Low risk |  |
|  |  |  |
| **Bialka 202115** | | |
| **Domain** | **Risk of bias** |  |
| Randomization process | Low risk | Allocation sequence concealed and randomized with computer |
| Deviation from intended intervention | Low risk | No blinding, but no deviations related to trial context |
| Missing Outcome data | High risk | 36.6% missing data |
| Measurement of outcome | Low risk | Appropriate method, did not differ between groups, outcome assessors aware of intervention |
| Selection of reported results | Low risk | Trial Registered, NCT04414488 |
| Overall | High risk |  |
|  |  |  |
| **Finnerty 202025** | | |
| **Domain** | **Risk of bias** |  |
| Randomization process | Low risk | Allocation sequence concealed and randomized with computer |
| Deviation from intended intervention | Low risk | Participants and personnel unaware of intervention |
| Missing Outcome data | Low risk | No missing outcome data |
| Measurement of outcome | Low risk | Appropriate method, did not differ between groups, outcome assessors aware of intervention |
| Selection of reported results | Low risk | Trial Registered, NCT 03862612 |
| Overall | Low risk |  |
|  |  |  |
| **Zhang 201550** | | |
| **Domain** | **Risk of bias** |  |
| Randomization process | Low risk | Random, no comments on concealing but no evidence of effect on baseline characteristics |
| Deviation from intended intervention | Low risk | Participants and personnel blinded; no apparent deviation due to trial context |
| Missing Outcome data | High risk | 12% missing outcome data |
| Measurement of outcome | Low risk | Method measurement appropriate and did not differ between groups, triple blinded |
| Selection of reported results | Low risk | Trial Registered, NCT ChiCTR-TRC-14004286 |
| Overall | High risk |  |
|  |  |  |
| **Baytar 202114** | | |
| **Domain** | **Risk of bias** |  |
| Randomization process | Low risk | Allocation sequence concealed and randomized with computer |
| Deviation from intended intervention | Low risk | Participants blinded, unclear if personnel blinded, no apparent deviations due to trial context |
| Missing Outcome data | High risk | 11% data missing |
| Measurement of outcome | Low risk | Method measurement appropriate and did not differ between groups, double blinded |
| Selection of reported results | Low risk | Trial Registered: CT04235530 |
| Overall | High risk |  |
|  |  |  |
|  |  |  |
| **Chen 201916** | | |
| **Domain** | **Risk of bias** |  |
| Randomization process | Low risk | computer generated and envelope sealed |
| Deviation from intended intervention | Low risk | Personnel blinded, no deviations |
| Missing Outcome data | High risk | 20% data missing |
| Measurement of outcome | Some concerns | unclear whether patients blinded |
| Selection of reported results | Low risk | ChiCTR1800019002) |
| Overall | High risk |  |
|  |  |  |
| **Yoshioka, 200648** | | |
| **Domain** | **Risk of bias** |  |
| Randomization process | Low risk | Randomized via sealed envelope |
| Deviation from intended intervention | Low risk | Patient not blinded, personnel blinding unclear, however no protocol deviation reported |
| Missing Outcome data | Low risk | No missing data |
| Measurement of outcome | High Risk | Method measurement appropriate and did not differ between groups, personnel and participants not blinded, patients had epidural in place after surgery its plausible that having the catheter would affect the way they rate their pain also its possible that the assessor (who can obviously see the epidural catheter) could be influences by its presence |
| Selection of reported results | Some concerns | Not registered |
| Overall | High risk |  |
|  |  |  |
| **Turhan, 202141** | | |
| **Domain** | **Risk of bias** |  |
| Randomization process | Low risk | Computer-generated random numbers and concealed using opaque closed envelopes |
| Deviation from intended intervention | Low risk | Participants not blinded; personnel blinded -- but no protocol deviations noted |
| Missing Outcome data | Low risk | 106/111 completed. 4.5% missing data |
| Measurement of outcome | Low risk | Method measurement appropriate and did not differ between groups, outcome assessors blinded |
| Selection of reported results | Some concerns | Not registered |
| Overall | Some concerns |  |
|  |  |  |
| **Ciftci, 202021** | | |
| **Domain** | **Risk of bias** |  |
| Randomization process | Low risk | Computer-generated randomization |
| Deviation from intended intervention | Low risk | Personnel blinded, no deviations |
| Missing Outcome data | Low risk | No missing outcome data |
| Measurement of outcome | Low risk | Method measurement appropriate and did not differ between groups, personnel blinded |
| Selection of reported results | Low risk | Registered: 66291034-604.01.01-E.4419 |
| Overall | Low risk |  |
|  |  |  |
| **Semyonov, 201939** | | |
| **Domain** | **Risk of bias** |  |
| Randomization process | Low risk | Computer-generated randomization |
| Deviation from intended intervention | Some Concerns | Patients and personnel are blinded, 9 patients had conversion to thoracotomy and were not excluded |
| Missing Outcome data | Low risk | No missing outcome data |
| Measurement of outcome | Low risk | Method measurement appropriate and did not differ between groups, patients and outcome assessors blinded -- block was performed at induction |
| Selection of reported results | Some concerns | Not registered |
| Overall | High Risk |  |
|  |  |  |
| **Gaballah, 201927** | | |
| **Domain** | **Risk of bias** |  |
| Randomization process | Low risk | Computerized randomization schedule with allocations sealed in opaque envelopes |
| Deviation from intended intervention | Low risk | Participants not blinded; personnel blinded -- but no protocol deviations noted |
| Missing Outcome data | Low risk | No missing outcome data |
| Measurement of outcome | Low risk | Method measurement appropriate and did not differ between groups, personnel and assessors blinded |
| Selection of reported results | Low risk | Registered: PACTR 201709002512418. |
| Overall | Low risk |  |
|  |  |  |
| **Chu 202019** | | |
| **Domain** | **Risk of bias** |  |
| Randomization process | Low risk | Computerized, concealed envelopes |
| Deviation from intended intervention | Some concerns | Unclear if personnel blinded. Participants were likely blinded but unclear |
| Missing Outcome data | Some concerns | 9.2% not in final analysis |
| Measurement of outcome | Some concerns | Unclear if assessors blinded, participants likely blinded but unclear |
| Selection of reported results | Low risk | Registered: ChiCTR1800016379 |
| Overall | High Risk |  |
|  |  |  |
| **Ciftci 202020** | | |
| **Domain** | **Risk of bias** |  |
| Randomization process | Some concerns | Computerized, no comment on concealment |
| Deviation from intended intervention | Low risk | Participants aware but no deviations |
| Missing Outcome data | Low risk | No missing outcome data |
| Measurement of outcome | Some risk | Participants were aware, other outcome assessors were blinded |
| Selection of reported results | Some concerns | Not registered |
| Overall | High risk |  |
|  |  |  |
| **Kim 201831** | | |
| **Domain** | **Risk of bias** |  |
| Randomization process | Low risk | Concealed, computerized |
| Deviation from intended intervention | Low risk | Everyone was blinded |
| Missing Outcome data | Some concerns | 5.5% missing data |
| Measurement of outcome | Low risk | Same between groups, outcome assessors not aware |
| Selection of reported results | Low risk | NCT02311517 |
| Overall | Some concerns |  |
|  |  |  |
| **Okmen 201834** | | |
| **Domain** | **Risk of bias** |  |
| Randomization process | Some risk | Computerized, no comment on concealment |
| Deviation from intended intervention | Low risk | Some personnel possibly aware of intervention, no evidence of deviations |
| Missing Outcome data | Low risk | No missing outcome data |
| Measurement of outcome | Low risk | Outcome measurement appropriate, outcome assessors blinded, patients likely blinded |
| Selection of reported results | Low risk | NCT03217292 |
| Overall | Some risk |  |
|  |  |  |
| **Shim 202040** | | |
| **Domain** | **Risk of bias** |  |
| Randomization process | Low risk | Sealed in envelopes, randomized by independent researcher |
| Deviation from intended intervention | Low risk | Patients and personnel are blinded; outcome assessor blinded |
| Missing Outcome data | High risk | 8/54 lost, 14% |
| Measurement of outcome | Low risk | Outcome measurement appropriate, outcome assessors blinded, patients blinded |
| Selection of reported results | Low risk | NCT03777592 |
| Overall | High risk |  |
|  |  |  |
| **Yao 202045** | | |
| **Domain** | **Risk of bias** |  |
| Randomization process | Low risk | Computerized, concealed envelopes |
| Deviation from intended intervention | Low risk | Patients, personnel and outcome assessors are blinded |
| Missing Outcome data | Low risk | 1.3% data missing |
| Measurement of outcome | Low risk | Outcome measures appropriate, outcome assessors blinded |
| Selection of reported results | Low risk | Registered: NCT03756987 |
| Overall | Low risk |  |
|  |  |  |
| **Ueda 201942** | | |
| **Domain** | **Risk of bias** |  |
| Randomization process | High risk | No comment on randomization processes, no comment on concealment, possible baseline imbalances |
| Deviation from intended intervention | Some concerns | Participants aware of intervention, possibly affected outcome. |
| Missing Outcome data | Low risk | 4.4% missing |
| Measurement of outcome | Some concerns | Outcome measures appropriate, outcome assessors aware of intervention and could have been influenced |
| Selection of reported results | Low risk | UMIN000012884 |
| Overall | High risk |  |
|  |  |  |
|  |  |  |
| **Qiu 202137** | | |
| **Domain** | **Risk of bias** |  |
| Randomization process | Low risk | Allocation concealment with sealed envelope, randomized using computer generator |
| Deviation from intended intervention | Low risk | No deviation reported |
| Missing Outcome data | Low risk | 2 out of 44. 4.5 % missing |
| Measurement of outcome | Low risk | Observer blinded |
| Selection of reported results | Some concerns | Not Registered |
| Overall | Some concerns |  |
|  |  |  |
| **Zhang 202252** | | |
| **Domain** | **Risk of bias** |  |
| Randomization process | Some concerns | Randomization and allocation concealment not reported, no characteristic imbalances |
| Deviation from intended intervention | Low risk | No deviation reported |
| Missing Outcome data | Some concerns | 6 patients excluded due to PONV and PCA discontinuation |
| Measurement of outcome | Low risk | Observer blinded |
| Selection of reported results | Low risk | ChiCTR1900024678 |
| Overall | Some concerns |  |
|  |  |  |
| **Dikici 202222** | | |
| **Domain** | **Risk of bias** |  |
| Randomization process | Low risk | Allocation concealment with sealed envelope |
| Deviation from intended intervention | Low risk | No deviation reported |
| Missing Outcome data | Some concerns | CONSORT report not available |
| Measurement of outcome | Low risk | Observer blinded |
| Selection of reported results | Some concerns | Not Registered |
| Overall | Sone concerns |  |
|  |  |  |
| **Zhang 202151** | | |
| **Domain** | **Risk of bias** |  |
| Randomization process | Low risk | Allocation concealment with sealed envelope, computer generated randomized list |
| Deviation from intended intervention | Low risk | No treatment deviations |
| Missing Outcome data | Low risk | No missing outcomes data |
| Measurement of outcome | Some concerns | Outcome measures appropriate, outcome assessors aware of intervention and could have been influenced |
| Selection of reported results | Low risk | ChiCTR1900023050 |
| Overall | Some concerns |  |
|  |  |  |
| **Qiu 202136** | | |
| **Domain** | **Risk of bias** |  |
| Randomization process | Low risk | Allocation concealment with sealed envelope, computer generated randomized list |
| Deviation from intended intervention | Low risk | No treatment deviations |
| Missing Outcome data | Low risk | One (1) patient was excluded due to intraoperative hemorrhage |
| Measurement of outcome | Low risk | Observers were blinded |
| Selection of reported results | Low risk | ChiCTR180001767 |
| Overall | Low risk |  |
|  |  |  |
|  |  |  |
| **Yildirim 202247** | | |
| **Domain** | **Risk of bias** |  |
| Randomization process | Some concerns | Allocation concealment technique not reported |
| Deviation from intended intervention | Low | Patient blinded, surgical procedure changes as below |
| Missing Outcome data | Some concerns | 5 out of 57 patients excluded for surgical procedure changes |
| Measurement of outcome | Low risk | Observer blinded |
| Selection of reported results | Low risk | NCT04855994 |
| Overall | Some concerns |  |

| **Chen 202218** | | |
| --- | --- | --- |
| **Domain** | **Risk of bias** |  |
| Randomization process | Low risk | Allocation concealment with sealed envelope technique |
| Deviation from intended intervention | Low risk | 1 patient excluded due to unplanned ICU admission |
| Missing Outcome data | Low risk | 2 patients excluded (due to withdrawal of consent and ICU admission) |
| Measurement of outcome | Some concerns | Observer blinding not reported |
| Selection of reported results | Low risk | ChiCTR1900027208 |
| Overall | Some concerns |  |

| **Yuan 202249** | | |
| --- | --- | --- |
| **Domain** | **Risk of bias** |  |
| Randomization process | Low risk | Random number generator and sealed envelope technique |
| Deviation from intended intervention | Low risk | 3 cases converted to open surgery |
| Missing Outcome data | Some concerns | 3 cases converted to open surgery |
| Measurement of outcome | Low risk | Observer blinded |
| Selection of reported results | Low risk | ChiCTR2100041783 |
| Overall | Some concerns |  |

| **Qiu 202238** | | |
| --- | --- | --- |
| **Domain** | **Risk of bias** |  |
| Randomization process | Low risk | Random number generator and sealed envelope technique |
| Deviation from intended intervention | Low risk | 1 case converted to open surgery |
| Missing Outcome data | Low risk | 1 case converted to open surgery |
| Measurement of outcome | Low risk | Observer blinded |
| Selection of reported results | Low risk | ChiCTR2000031609 |
| Overall | Low risk |  |

# Supplementary Table 3: additional characteristics of included studies

|  | **Block Techniques** | **Local Anaesthetic Doses** | **Regular Postoperative Analgesia** | **Chest Tube Insertion and Duration** |
| --- | --- | --- | --- | --- |
| Ahmed 201712 | Intercostal nerve block at level of thoracoscope insertion | 4 ml of 0.25% of bupivacaine | No regular analgesia reported | Yes, duration not reported |
| Azizoğlu 202113 | Ultrasound guided SAPB at the 5th intercostal space | 0.4 mL/kg of 0.25% Bupivacaine | 1g Paracetamol, IV, Q6h | No |
| Baytar 202114 | Ultrasound guided PVB at T4 transverse process;  ULTRASOUND guided SAPB at level of 4th and 5th ribs | 0.25% bupivocaine 20mL max (0.4cc/kg)  for both blocks | IV 20mg tenoxicam every 12 hours, 1g acetaminophen every 24 hours | No |
| Bialka 202115 | Ultrasound guided PVB at T3-4; nerve stimulator used to identify intercostal muscle activity | 0.5% plain bupivicaine 0.3cc/kg | Acetaminophen 1g ever 6 hours, Ketoprofen 100mg every 12 hours | No |
| Chen 201916 | Ultrasound guided SAPB at 5th and 6th ribs superficially;   Local infiltration | SAPB: 0.4 ml/kg 0.25% ropivacaine    Local: 10-15ml 0.25% ropivicaine | No regular analgesia reported | Yes, 3.7±0.9 for SAPB v 3.6±1.1 days for local infiltration |
| Chen 202017 | Ultrasound guided PVB at T5-7  Ultrasound guided ICN at T4-T9  Ultrasound guided ESPB at T5 | PVB: 20mL of 0.375% ropivacaine    ICN: 17cc of 0.375% ropivacine    ESPB: 20cc 0f 0.375% ropivacaine | Diclofenac 50mg as needed | Yes, duration not reported |
| Chen 202218 | Ultrasound guided PVB | 20ml 0.3% ropivacaine | Flurbiprofen 50mg as requested | Yes, duration not reported |
| Chu 202019 | Ultrasound PVB guided at T4-5 and T7-8 | 20cc 0.375% Ropivacaine | Flurbiprofen 50-100 mg as needed | No |
| Ciftci 202020 | Ultrasound guided ESPB | 20cc 0.25% bupivicaine | 400mg ibuprofen every 8 hours as needed | No |
| Ciftci 202021 | Ultrasound guided ESPB at T5  Ultrasound guided PVB at T5 | 20 mL of 0.25% bupivacaine for both | 400 mg ibuprofen every 8 hours | No |
| Dikici 202222 | Ultrasound guided SAP at 4th and 5th intercostal levels  Local infiltration at three port sites | SAP: 0.25 mL/kg of bupivacaine 0.25%    Local: 0.5 mL/kg of bupivacaine 0.25% (divided equally between three port sites) | Dexketoprofen as needed | No |
| Ding 201823 | Ultrasound guided PVB at T4-6 for two groups  TEA placed with loss of resistance to saline at T5-6 | 15mL of 0.5% Ropivacaine in one PVB group    15mL of 0.5% ropivacaine combined with dexmedetomidine (1 μg/kg) in other PVB group | Flubriprofen 50mg every 6 hours | Yes, duration not specified |
| Ekinci 202024 | Ultrasound guided ESP at T5  Ultrasound guided SAP in interfascial plane at 4th and 5th ribs | 20-mL volume of 0.25% bupivacaine for both blocks | No regular analgesia reported | No |
| Finnerty 202025 | Ultrasound guided ESP at T5  Ultrasound guided SAP at 5th fib | 30ml of 0.25% levobupivacaine for both blocks | Tylenol 1g IV every 6 hours and Ibuprofen 400mg every 8 hours | No |
| Fu 202126 | Ultrasound guided PVB at T5-6  ESPB at interfacial plane between the erector spinae muscle and T5 transverse process  T5–T6 level | 20cc of 0.5% Ropivacaine for all three groups | Flurbiprofen 50 mg as rescue analgesia | Yes, duration not specified |
| Gaballah 201927 | Ultrasound guided ESP over T5  Ultrasound guided SAP over 6th rib | 20 mL of 0.25% bupivacaine in both groups | Ketorolac 30mg for VAS score >4 | No |
| Kang 202028 | Ultrasound guided PVB at T4-5 and T6-7 | 20 mL of 0.5% ropivacaine | No regular postoperative analgesia | No |
| Kaya 200629 | PVB at T4-8;  Sham block | PVB: 4 mL of 0.5% bupivacaine with 1:200,000 epinephrine per level  Sham block: 10 mL of 0.9% Normal Saline | No regular analgesia reported | No |
| Kim 201831 | Ultrasound guided SAP at T5; Sham block | 0.4mL/kg of 0.375% ropivacaine  0.4mL/kg of 0.9% Normal Saline | Codeine 10 mg/acetaminophen 250mg/ibuprofen 200 mg combination tablet every 8 hours | No |
| Kim 200930 | Thoracic epidural anaesthesia at T5-6 or T6-7 | 6mL of 0.2% Ropivicaine with 50mcg of Fentanyl + infusion of 2,500 μg of fentanyl in 500 mL of 0.2% ropivacaine (3cc prn // Q15min // 4cc basal ) | No regular analgesia reported | yes, 53.5 in TEA group v 48.7 hrs in control group |
| Lee 202032 | 3 ICN injections at port sites  U/S guided SAP at 5th rib level | 20mL of 0.375% ropivacaine both | Ketorolac 30mg for (NRS) score of 4 or 5 | Yes, 1 day median in both groups |
| Luo 202133 | PECS II block between T2-T6;  Sham block | 25mL of 0.5% Ropivacaine; 25mL of 0.9% normal saline | No regular analgesia reported | yes (3.35+/- 1.09 days in groups 1 VS 3.40+/- 1.64 days in group 2) |
| Okmen 201834 | Ultrasound guided SAP at mid axillary line | 20mL of 0.25% bupivacaine | Tenoxicam 20mg 1 dose. Paracetamol every 8 hours | No |
| Park 201835 | Ultrasound SAP at 5th and 7th ribs | 30mL of 0.375% Ropivacaine w/ 10ug Epinephrine | Propacetamol 1g, Ketorolac 15mg every 6 hours for 24 hours | Yes, duration not specified |
| Qui 202136 | Ultrasound guided superficial SPB between the 4th and 5th ribs | 0.4 ml/kg of 0.375% ropivacaine | 50mg flurbiprofen as needed with 200mg maximum daily | No |
| Qiu 202137 | Ultrasound guided SAP;  Ultrasound guided PVB at T4-T6 | 30 ml of 0.375% ropivacaine | 50 mg flurbiprofen as required | No |
| Qiu 202238 | Ultrasound guided PVB at T4-6 | 0.6ml/kg of 0.5% ropivaine | Parocoxib BID | Yes, duration not specified |
| Semyonov 201939 | Ultrasound guided SAP between 4th and 5th rib | 2mg/kg of 0.25% bupivacaine hydrochloride and 8mg of dexamethasone | Unspecified NSAIDS and acetaminophen | No |
| Shim 202040 | Ultrasound guided ESP at T5 | 25mL of 0.5% ropivacaine | No regular analgesia reported | No |
| Turhan 202141 | Ultrasound guided ESP at T5;  Ultrasound guided PVB at T5;  ICN block at T4-T7 | 20mL of 0.5% bupivacaine total for all three blocks | 1 g of acetaminophen three times per day and 20 mg of tenoxicam once daily | yes. removal 2.91 days +/- 1.29 in group 1, 2.88 days +/- 1.3 in group 2; 2.97 days +/- 1.2 days in group 3≥ P= 0.96 |
| Ueda 201942 | ICN block at 4th-6th intercostal nerves  Epidural anaesthesia T4/5 or T5/6 interspace | ICN: 21mL of 0.375% ropivacaine  TEA: 5mL load of 0.2% ropivacaine with fentanyl continuously 2mL/hr for 2 days | Celecoxib 400mg once daily, Voltaren suppository, Intramuscular pentazocaine | Yes, 11 (52.4%) in ICB group and 10 (45.5%) in TEA group |
| Viti 202043 | Ultrasound guided SAP, deep approach | 30mL of 0.3% ropivacaine | Oral acetaminophen 1000mg every 12 hours | Yes. 4.7 days in group 1 VS 3.5 days in group 2 |
| Vogt 200544 | PVB at T5;  Sham Puncture | Bupivacaine 3.75mg/mL and Epinephrine 1:200,000 0.4mL/Kg | Propacetamol 2g IV every 6 hours (until tolerating PO), then acetaminophen 1g PO every 6 hours | No |
| Yao 202045 | Ultrasound guided ESP at T5;  Sham block | ESP: 25mL of 0.5% ropivacaine.  Sham: 25mL 0.9% normal saline | Parecoxib 50mg every 12 hours | No |
| Yeap 202046 | Ultrasound guided PVB at T7 and T8;  Epidural anaesthesia at T7-8 | PVB: 30mL of 0.5% ropivacaine  TEA: Continuous epidural mixture of 0.125% bupivacaine and 0.05mg/mL of hydromorphone | No regular analgesia reported | No |
| Yildirim 202247 | Ultrasound guided PVB at T5/T7  PECs II at 4th intercostal space | PVB: 30 mL of 0.375% bupivacaine  PECs: 20mL of 0.375% bupivacaine | 1g acetaminophen as needed for pain score >4 | Yes, duration not reported |
| Yoshioka 200648 | Epidural anaesthesia at T5/6 or T6/7 | Bolus of 5mL of 0.25% bupivacaine, followed by continuous infusion of 80mL of 0.25% bupivacaine and 1 mg of fentanyl citrate at rate of 2mL/hr | Diclofenac and loxoprofen | Yes. 13 people in group 1 VS 12 people in group 2 have chest tube drainage |
| Yuan 202249 | Ultrasound guided T4-5, T6-7 PVB | 15mL of 0.33% ropivacaine or saline | Flurbiprofen as required | No |
| Zhang 201550 | PVB at T4 and T7, surgeon performed.  Wound infiltration  Sham block | PVB: 16mL of 0.5% ropivacaine  Wound Infiltration: 40mL of 0.5% ropivacaine maximum  Sham: 0.9% normal saline | Parecoxib 40mg at 0hr, 12hr, and 24hr postop. | Yes, duration not reported |
| Zhang 202151 | Epidural anaesthesia at T7/8  Single-shot and continuous ESP block | Epidural: Three doses of 5mL of 0.1875% Ropivacaine injected every 5 minutes at beginning of case, then once every hour for entire case  ESP: 30cc of 0.375% ropivacaine as a SSB and post-operative continuous infusion of 0.2% ropivacaine dissolved in 250mL of 0.9% normal saline | No regular analgesia reported | No |
| Zhang 202252 | Ultrasound guided PVB at T5;  Ultrasound guided Deep SAP;  Ultrasound guided Superficial SAP | 20 ml of 0.5% ropivacaine for all three blocks | Flurbiprofen 100mg as needed | No |
| Zhao 202053 | Ultrasound guided ESP at T4 and T6;  Ultrasound guided PVB at T4-6 | 30mL of 0.4% ropivacaine for both blocks | Loading dose of flurbiprofen 1.5mg/kg IV post-op then continuous infusion of flurbiprofen at 8mg/hr | Yes. 2.6 days +/- 0.6 in group 1 VS 2.9 days +/- 1.1 in group 2. (P = 0.174) |

# Pairwise heterogeneity analysis

| Pairwise heterogeneity of postoperative opioid requirements | | |
| --- | --- | --- |
| Pairwise comparisons | TE & 95% CI | I^2 |
| PVB:ESP | 0.2358 &[-0.0220; 0.4936] | 55.60% |
| No block:ESP | -4.2733 & [-4.8837; -3.6629] | 11.30% |
| SAP:ESP | -0.1704 & [-0.5249; 0.1840] | 0% |
| No block:PVB | -1.3033 & [-1.5634; -1.0433] | 94.50% |
| No block:TEA | -0.6780 & [-1.1248; -0.2312] | 88% |
| No block:SAP | -0.7835 & [-1.0155; -0.5515] | 81.60% |
| PVB:TEA | -1.8163 & [-2.2087; -1.4238] | 94.40% |

| Pairwise heterogeneity of postoperative static NRS AUC | | |
| --- | --- | --- |
| Pairwise comparisons | TE & 95% CI | I^2 |
| ICN:SAP | -0.6075 & [-1.0453; -0.1696] | 91% |
| PVB:ESP | -0.2178 & [-0.4809; 0.0454] | 88.50% |
| No block:SAP | -1.6755 & [-1.8780; -1.4729] | 93.10% |
| No block:PVB | -1.0478 & [-1.2366; -0.8589] | 64.50% |
| No block:ESP | -4.1067 &[-4.7378; -3.4756] | 97.30% |
| PVB:TEA | -1.0450 & [-1.4003; -0.6897] | 96.10% |
| SAP:ESP | -0.4512 & [-0.7570; -0.1455] | 93.80% |
| No block:TEA | -1.0271 & [-1.3591; -0.6952] | 89.90% |
| PVB:SAP | -0.2489 & [-0.6341; 0.1363] | 73.00% |

| Pairwise heterogeneity of postoperative dynamic NRS AUC | | |
| --- | --- | --- |
| Comparisons | TE & 95% CI | I^2 |
| No block:SAP | -1.5801 & [-1.8842; -1.2760] | 96.50% |
| No block:PVB | -1.9615 & [-2.2628; -1.6601] | 82.30% |
| No block:ESP | -3.0786 & [-3.5963; -2.5608] | 96.10% |
| PVB:ESP | -0.3552 & [-0.7125; 0.0021] | 92.80% |
| PVB:TEA | -0.3905 & [-0.7140; -0.0671] | 59.90% |
| SAP:ESP | 0.2263 & [-0.1479; 0.6005] | 96.10% |
| No block:TEA | -1.5561 & [-1.9192; -1.1929] | 93.70% |
| PVB:SAP | -0.0451 & [-0.4258; 0.3357] | 0.00% |

| Pairwise heterogeneity of PONV risks | | |
| --- | --- | --- |
| Pairwise comparisons | TE & 95% CI | I2 |
| PVB:SAP | 2.5729 [1.2948; 5.1123] | 0.0% |
| No block:SAP | 0.5004 [0.3458; 0.7242] | 0.0% |
| No block:PVB | 0.6798 [0.2058; 2.2449] | 0.0% |
| SAP:ESP | 0.4964 [0.2028; 1.2153] | 0.0% |
| PVB:ESP | 9.5396 [2.3894; 38.0854] | 67.5% |
| No block:TEA | 0.0888 [0.0080; 0.9860] | 93.1% |
| No block:ESP | 0.3254 [0.0332; 3.1936] | 47.9% |

# 24-hour opioid requirement

## Network diagram for 24-hour opioid requirement comparisons


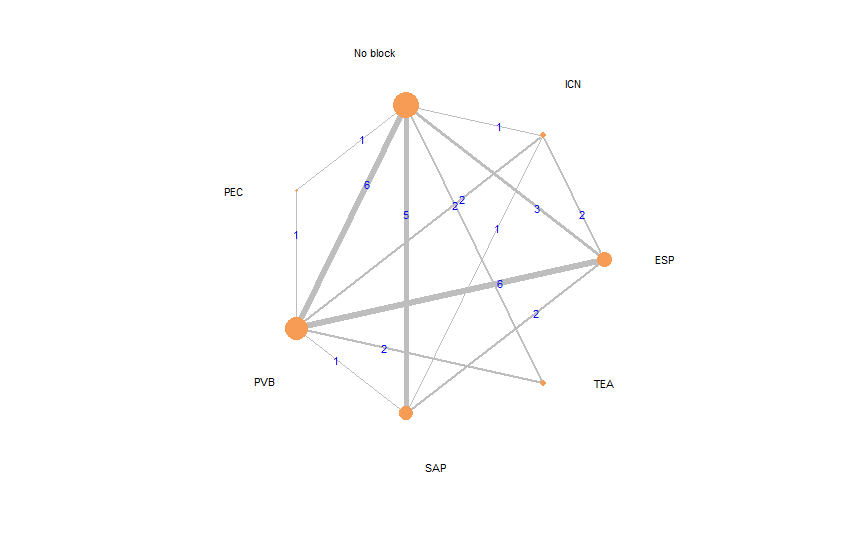


## Rankogram for 24-hour opioid requirement comparisons between the pain interventions


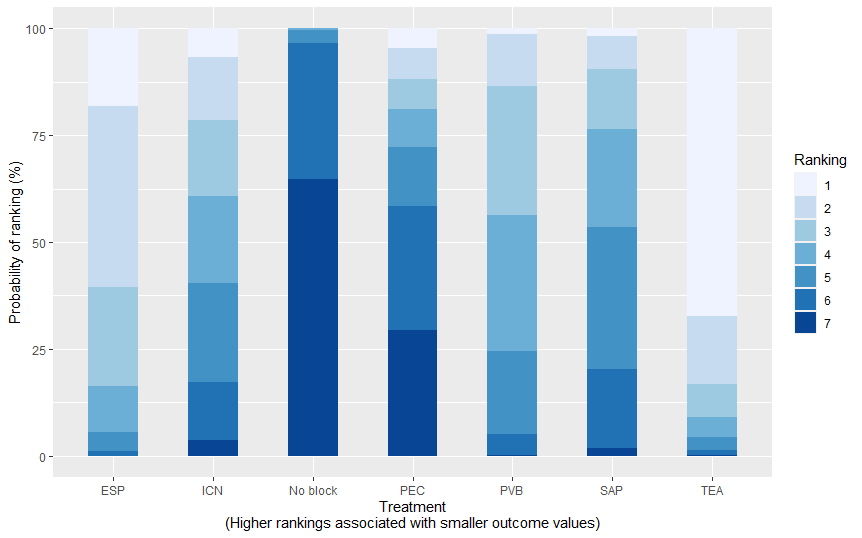


## SUCRA graph for 24-hour opioid requirement comparisons between the pain interventions


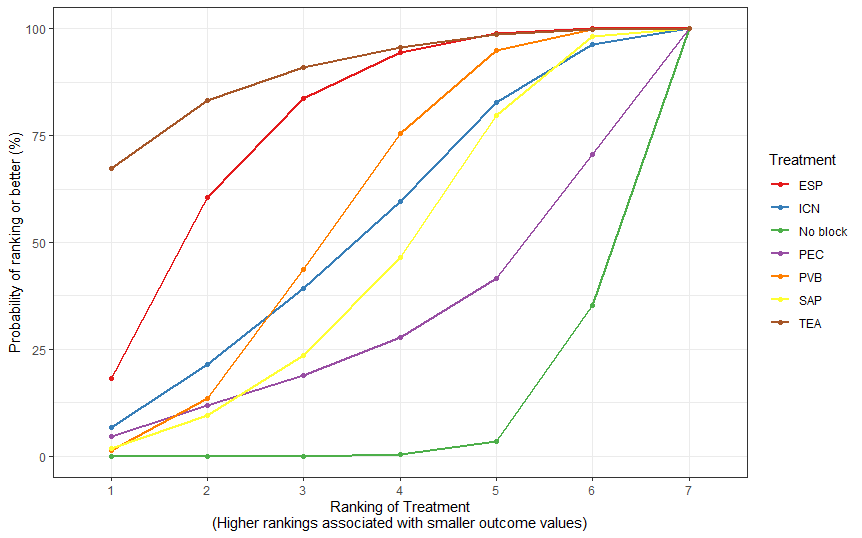


## Funnel plot for 24-hour opioid requirement comparisons


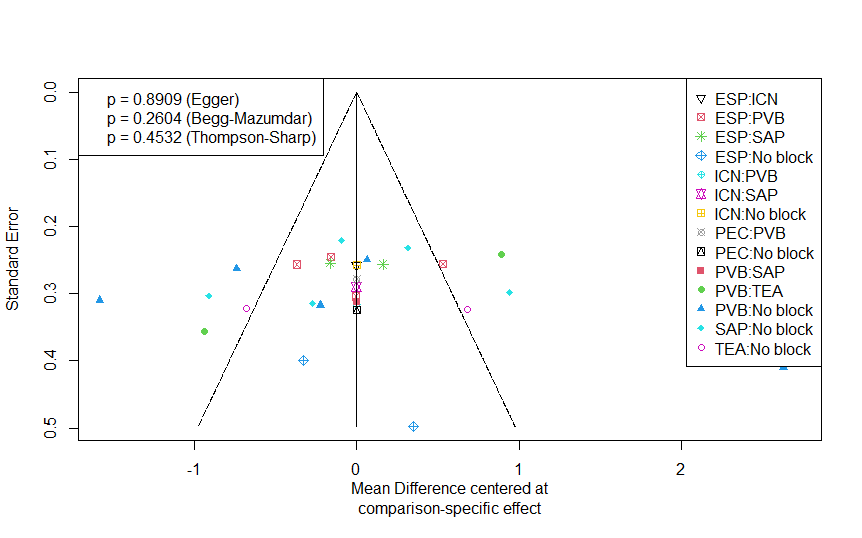


## Leverage plot for 24-hour opioid requirement comparisons


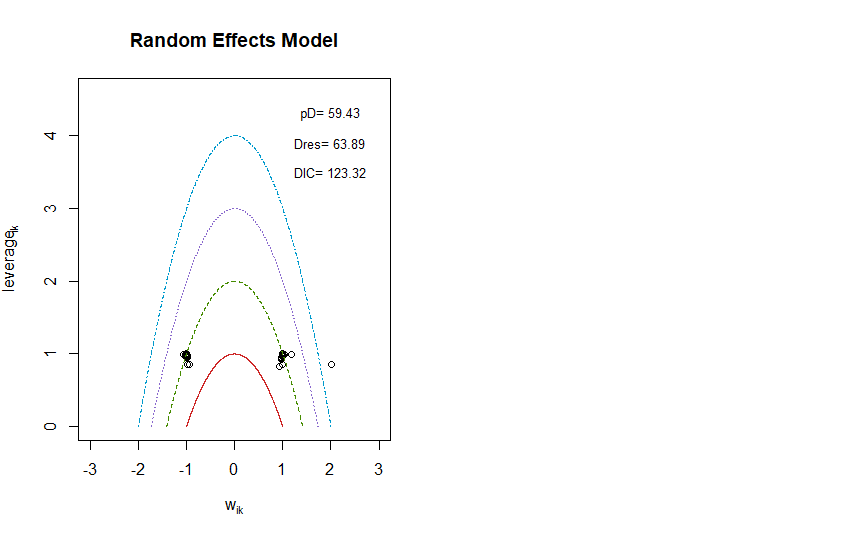


Consistency plot for 24-hour opioid requirement comparisons


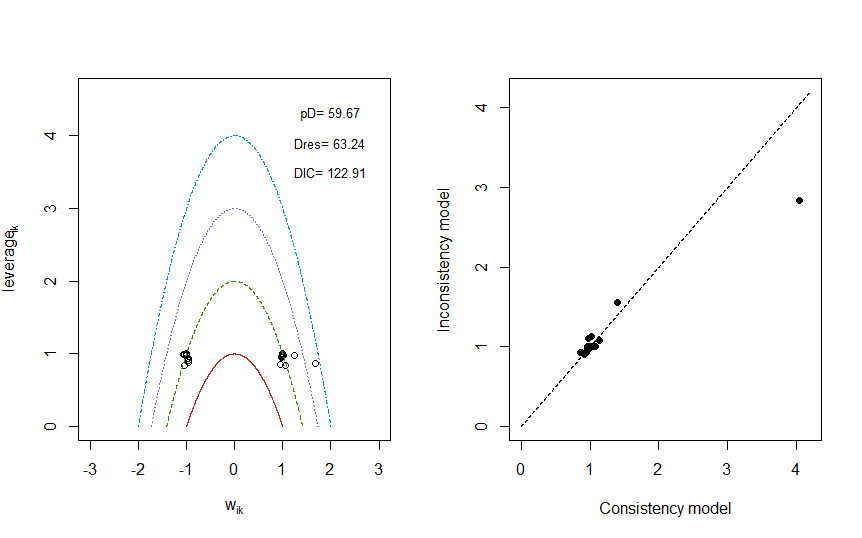


## Sensitivity analysis excluding the study by Yeap et al

League table


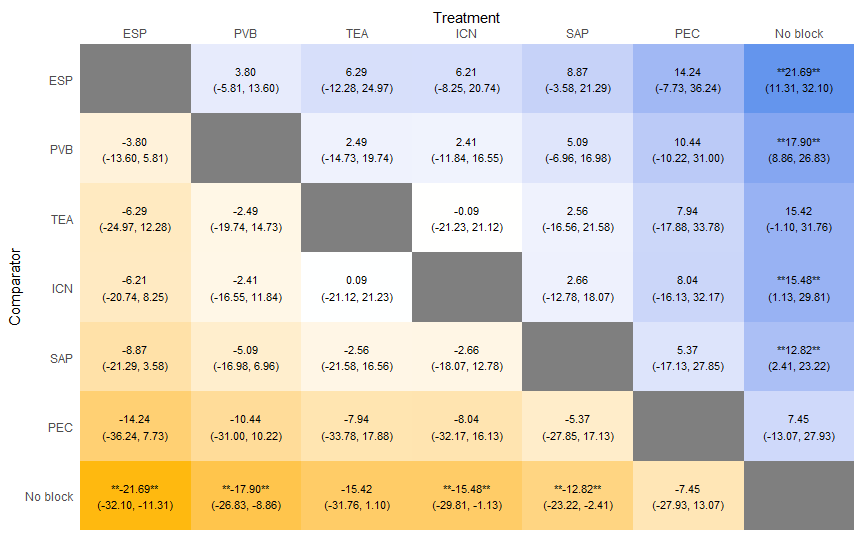


Forest plot


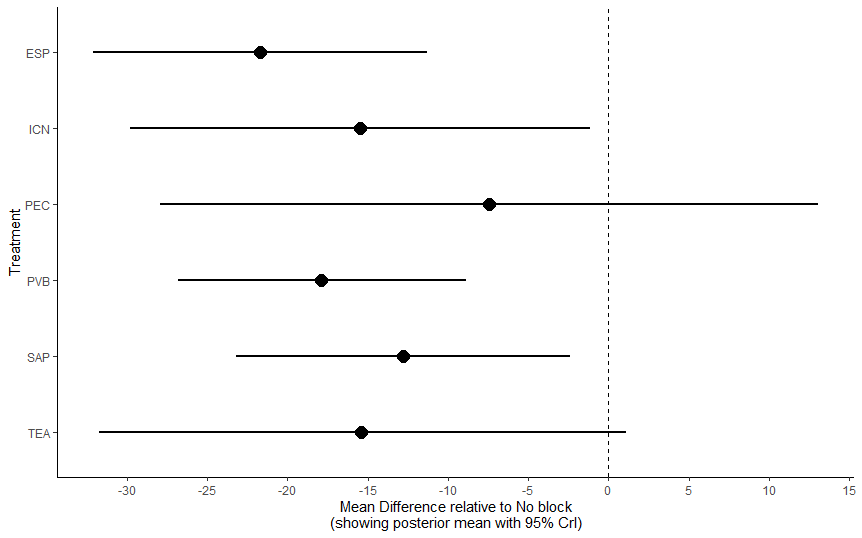


Leverage plot


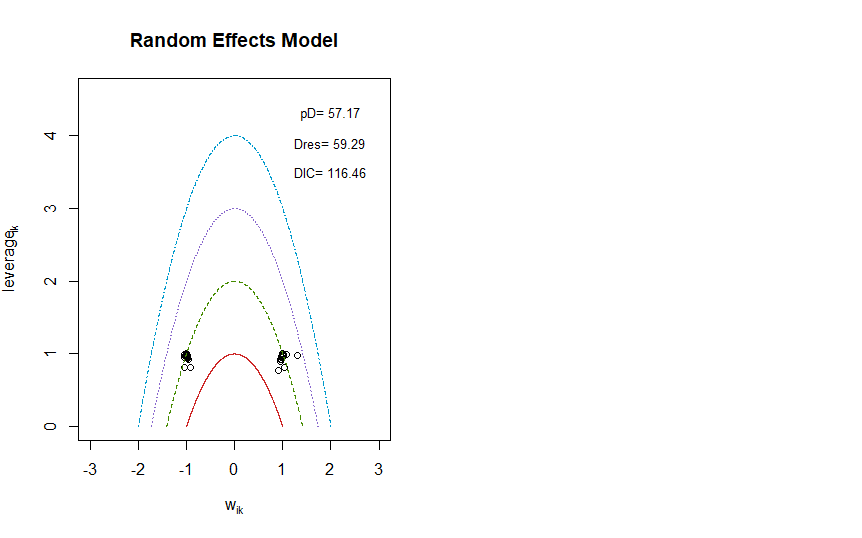


Consistency plot


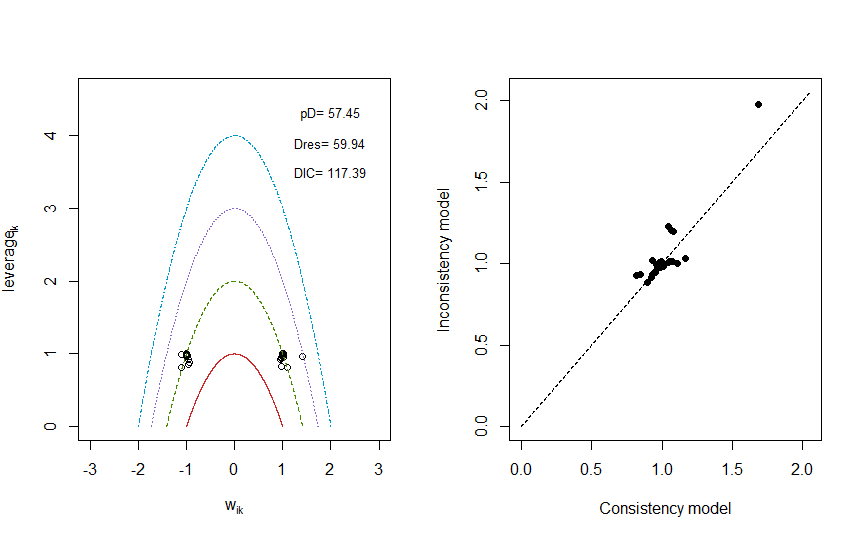


## Sensitivity analysis excluding studies that used surgical site infiltration as control

Forest plot

‘
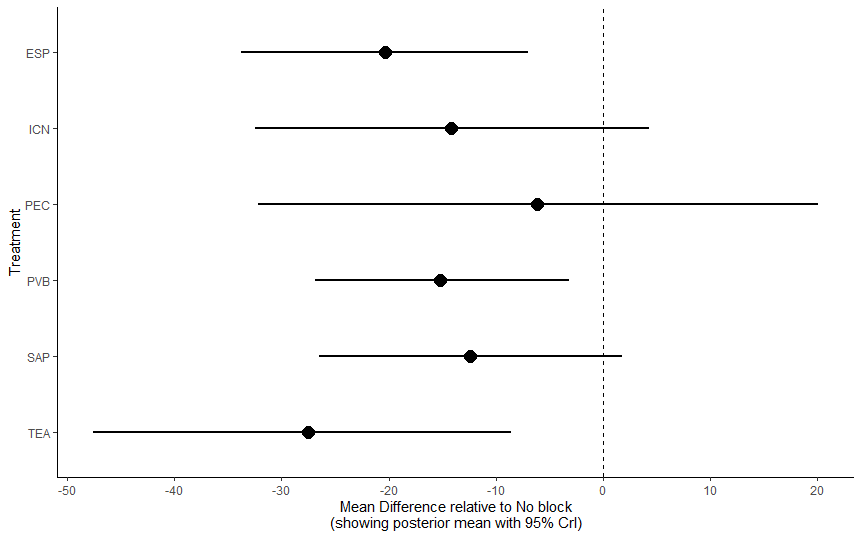


League table


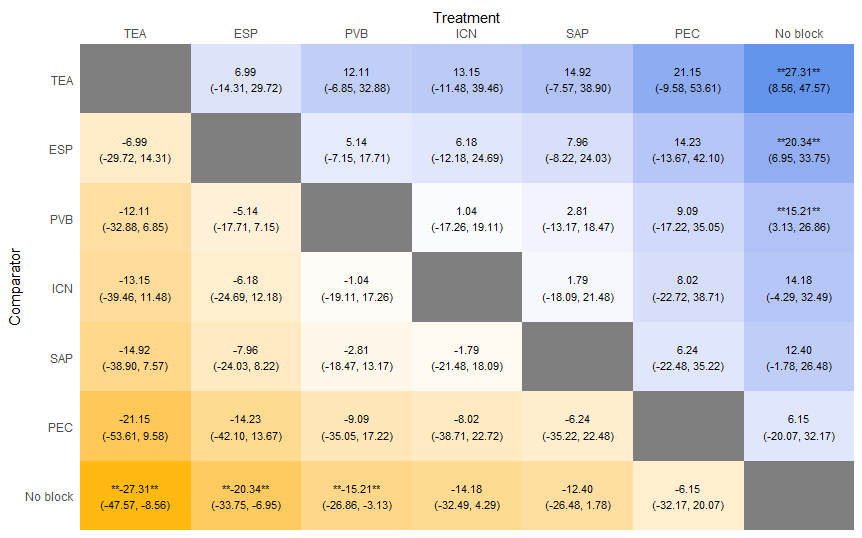


Leverage plot


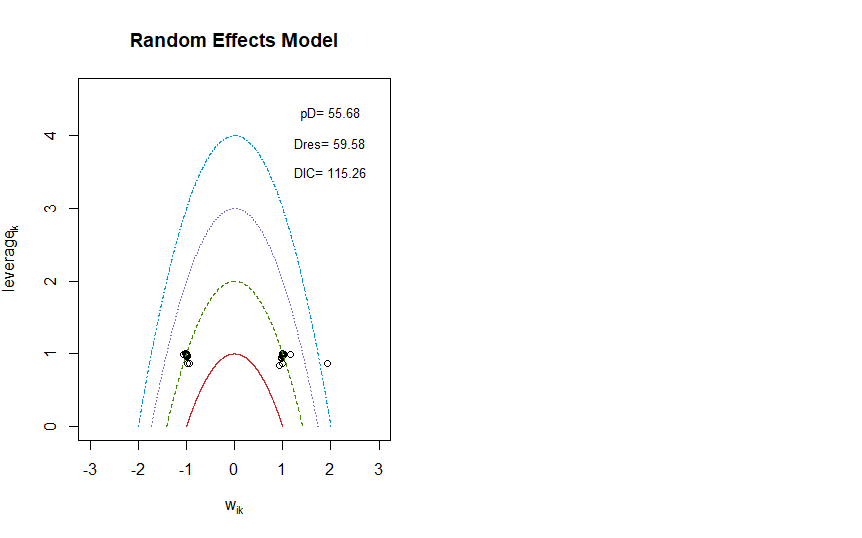


## Sensitivity analysis excluding studies with high risk of bias

Forest plot


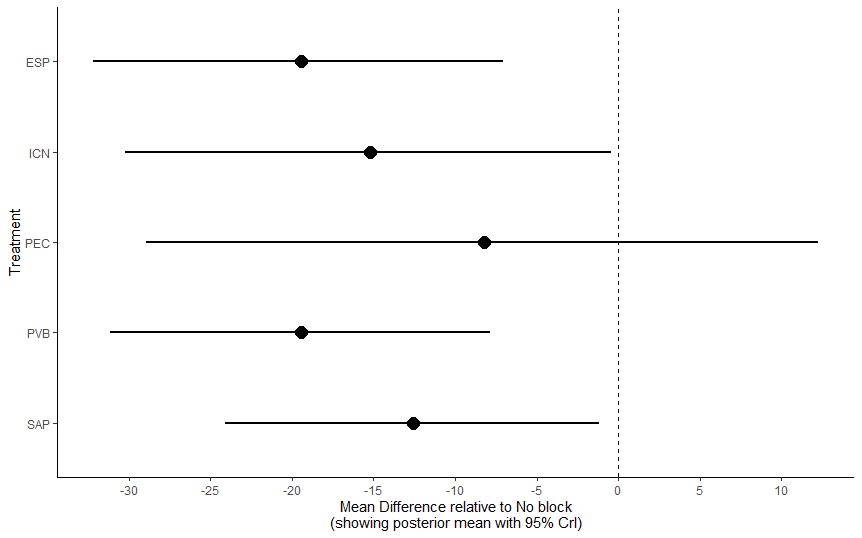


League table


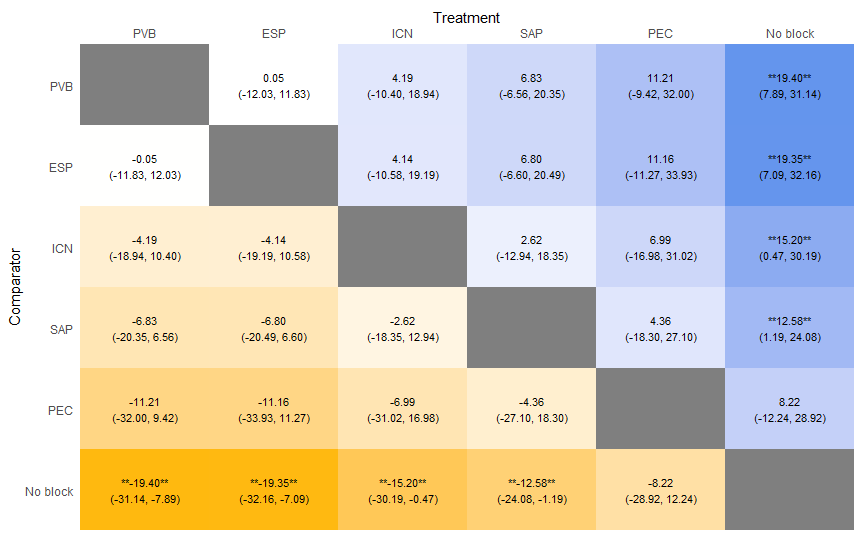


Leverage plot


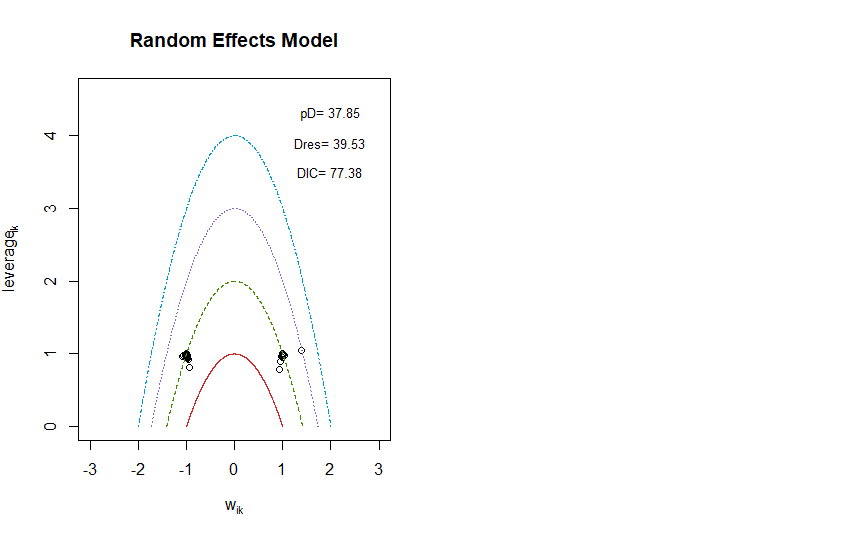


## Sensitivity analysis excluding studies with inadequate patient blinding


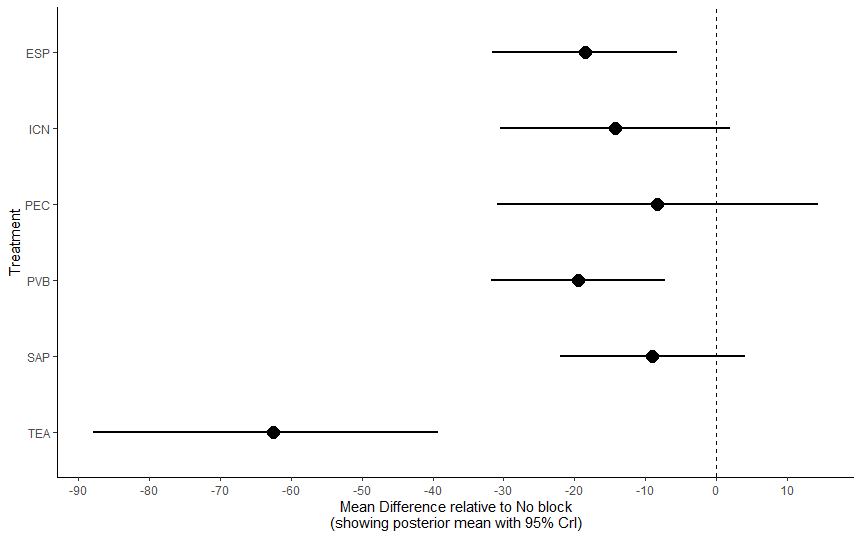


League table
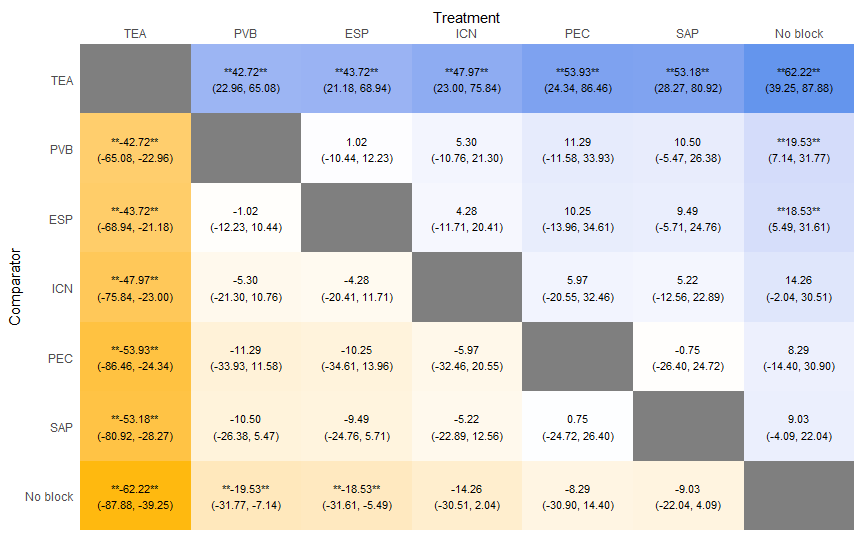


Leverage plot


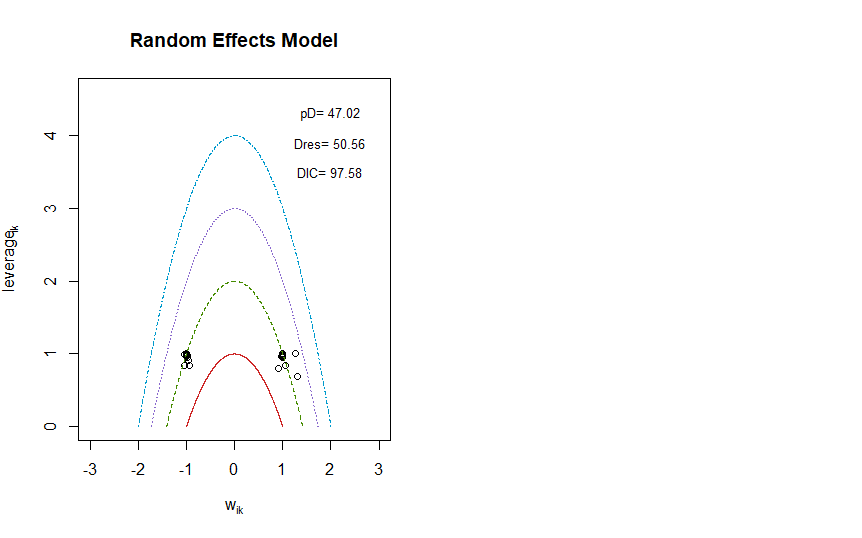


## Subgroup analysis of studies with vs without chest tube

No tube


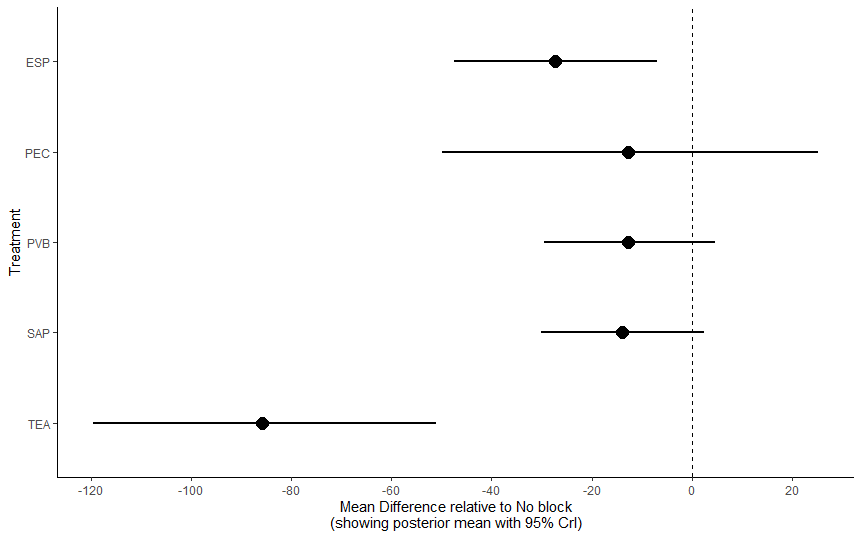


With chest tube


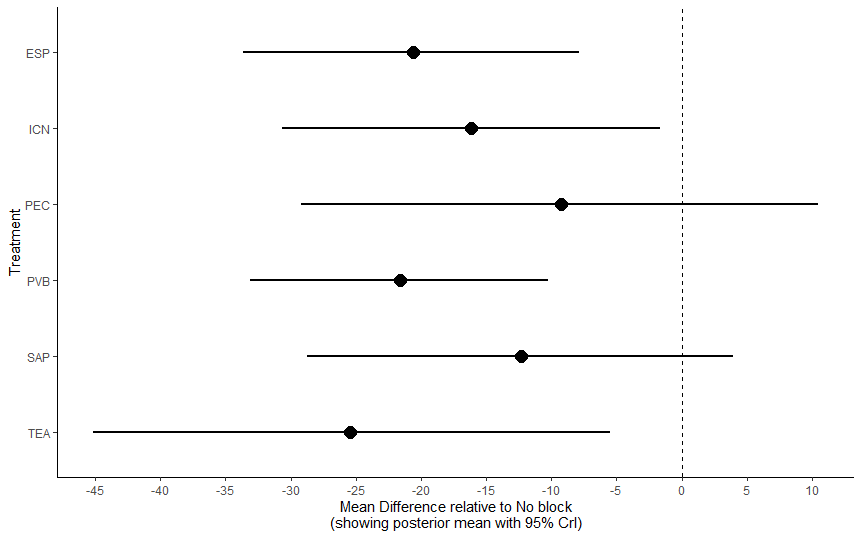


# 24-hour static pain score AUC

## Network diagram for 24-hour pain score AUC comparisons


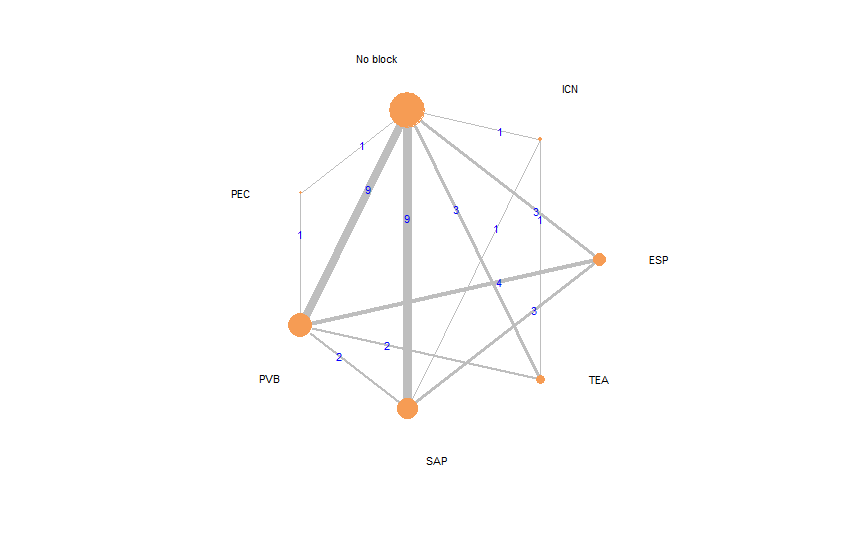


## Rankogram for 24-hour pain score comparisons between the pain interventions


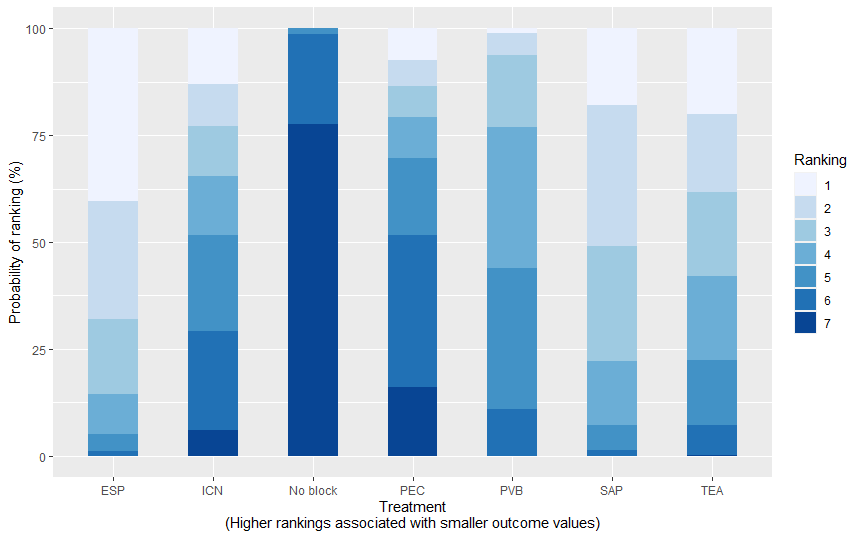


## SUCRA graph for 24-hour pain score comparisons between the pain interventions


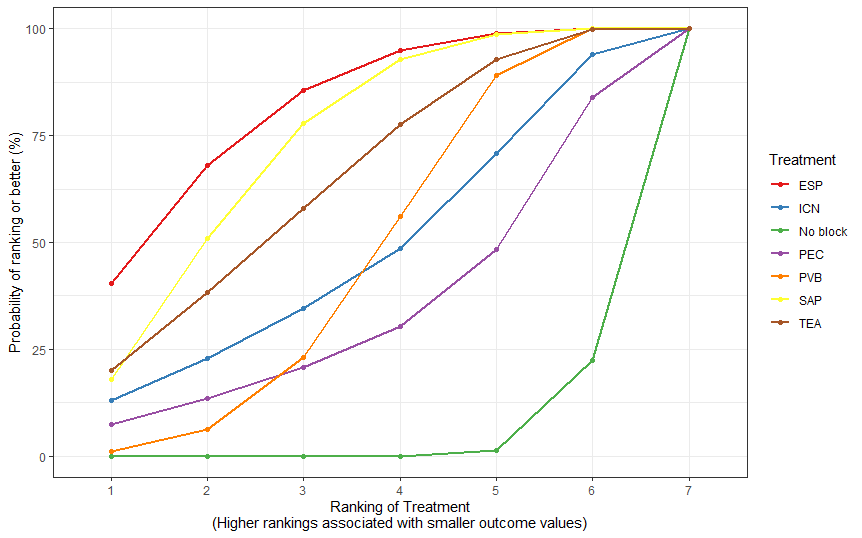


## Funnel plot for 24-hour pain score comparisons


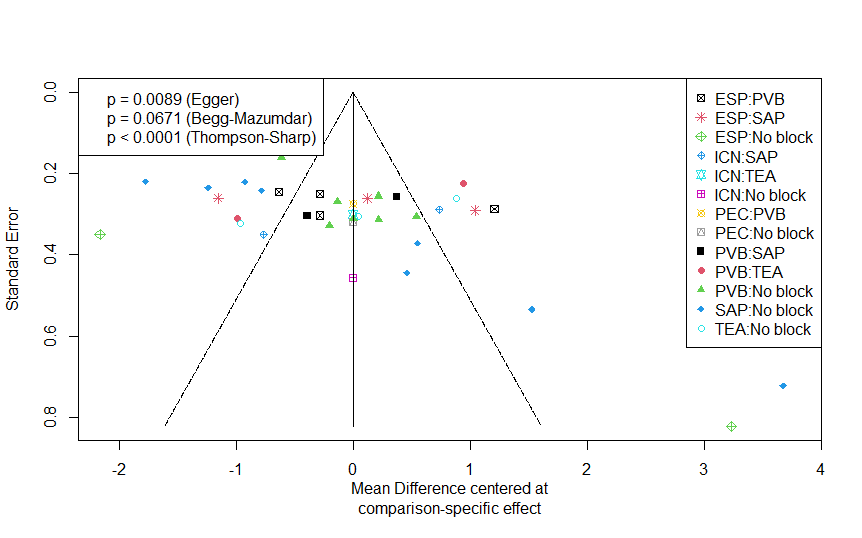


## Leverage plot for 24-hour pain score comparisons


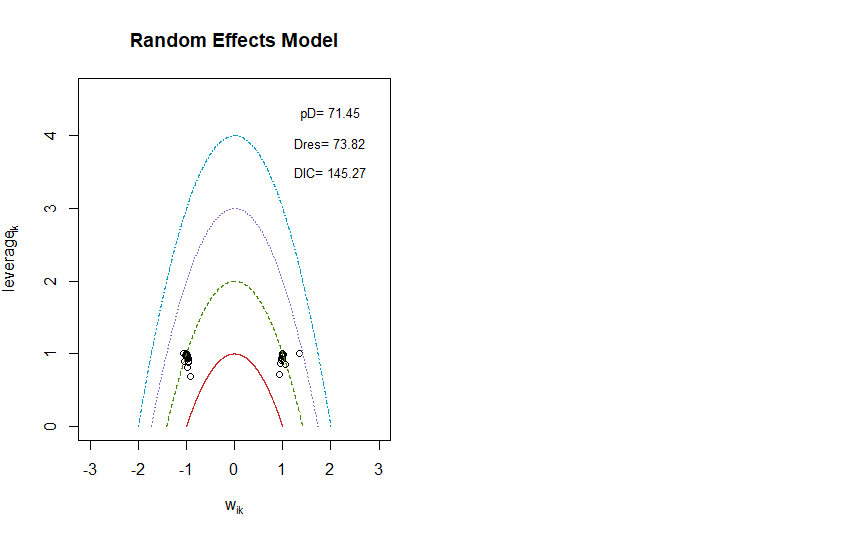


## Consistency plot for 24-hour pain score comparisons


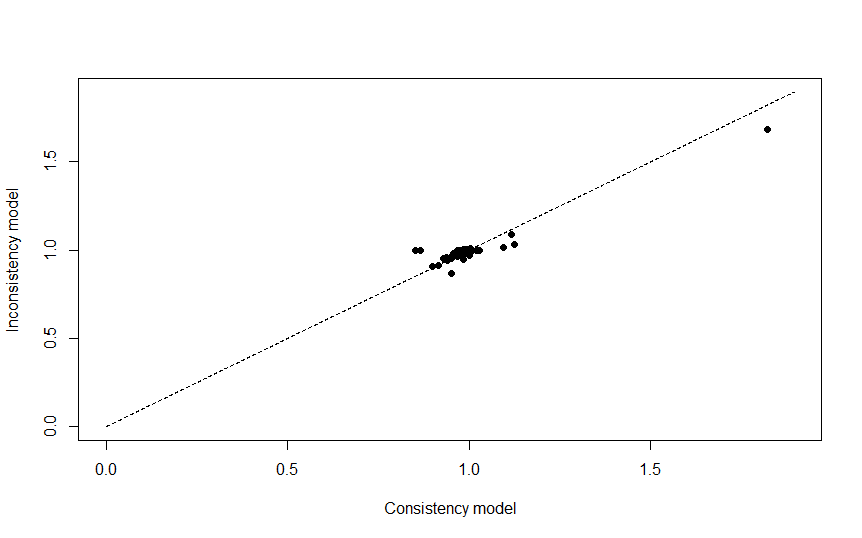


## Sensitivity analysis excluding studies that used surgical site infiltration as control

League table
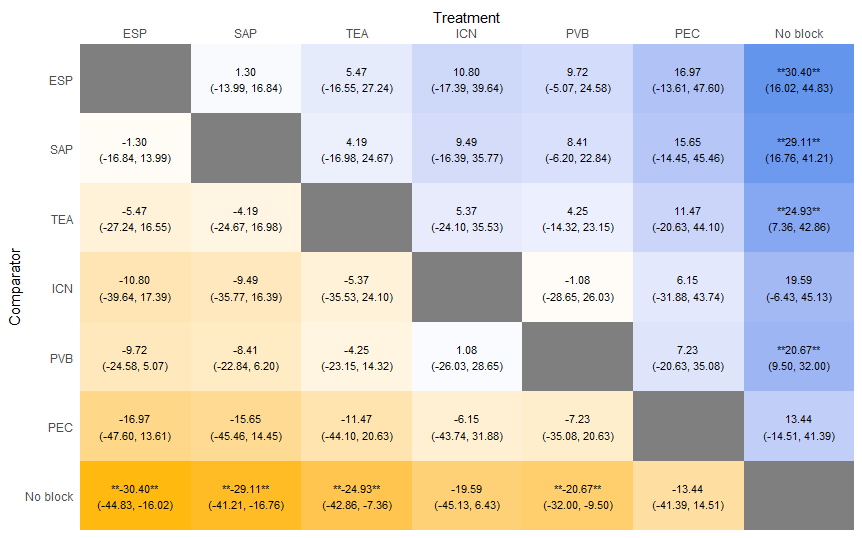


Forest plot


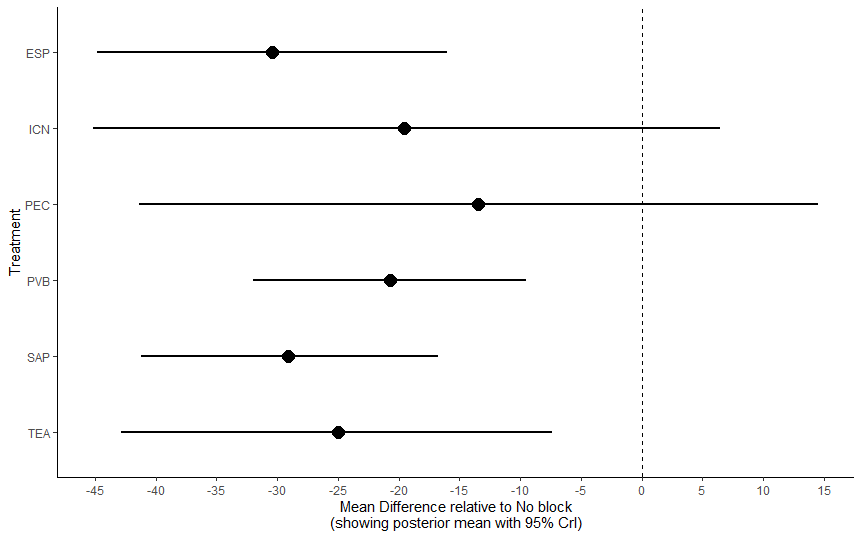


Leverage plot


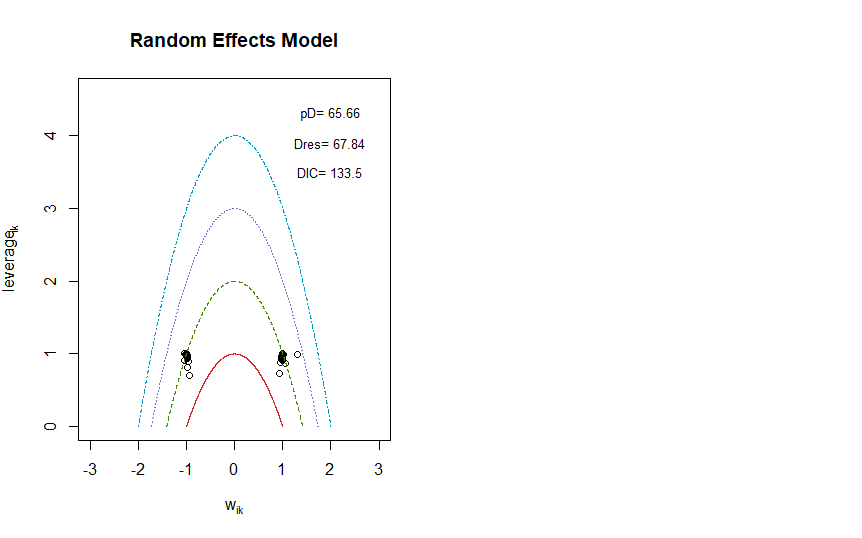


## Sensitivity analysis excluding studies with inadequate patient blinding

League table


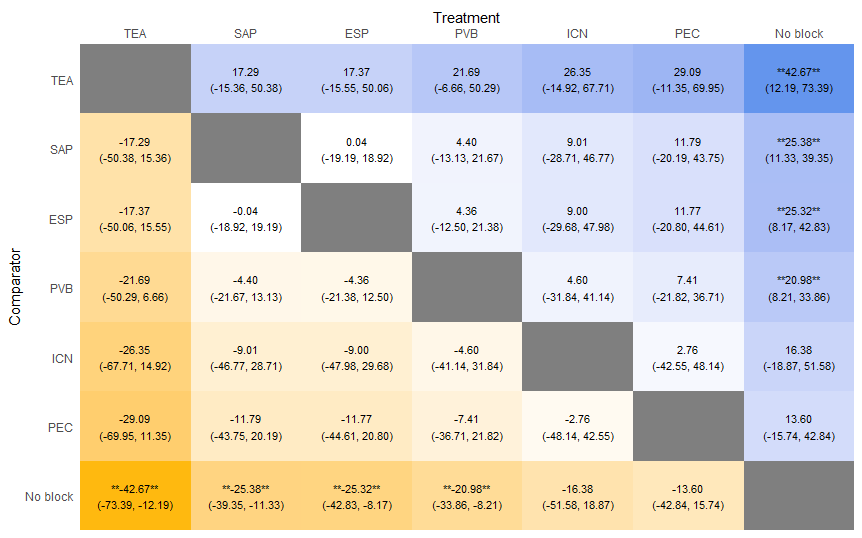


Forest plot


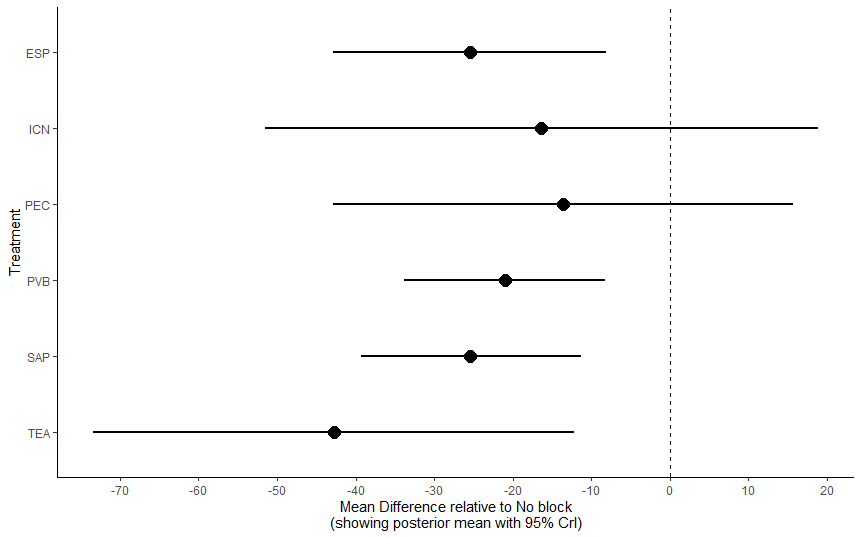


Leverage plot


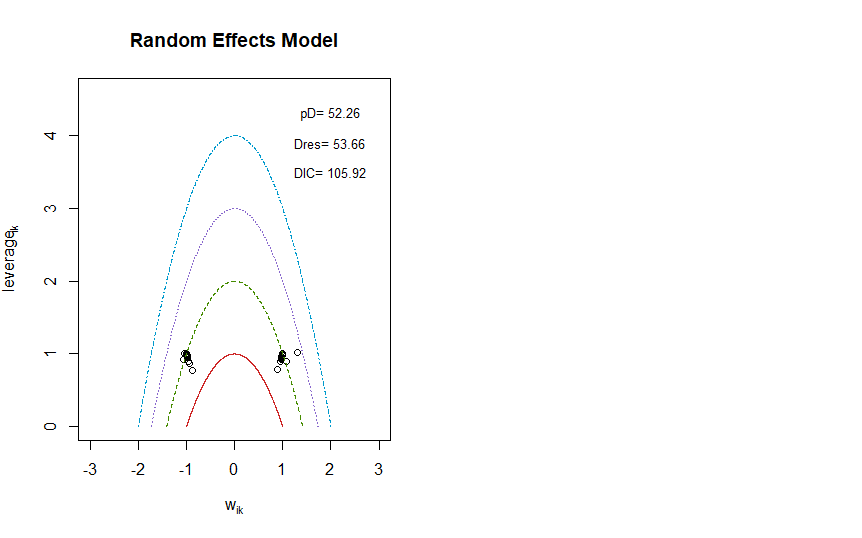


## Sensitivity analysis excluding studies with high risk of bias

League table
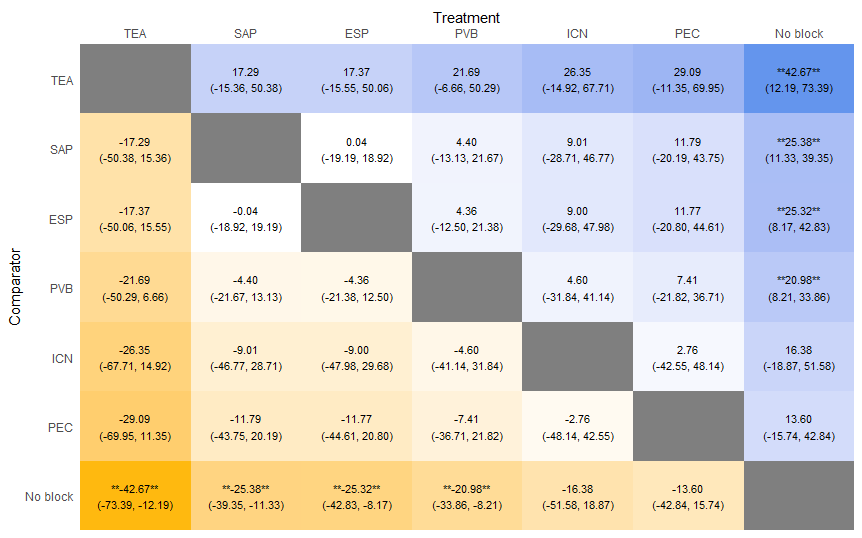


Forest plot


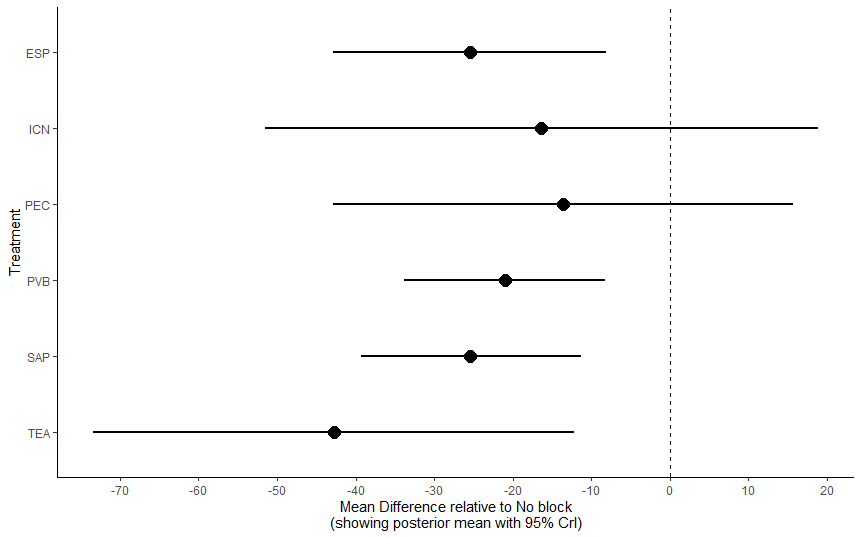


Leverage plot


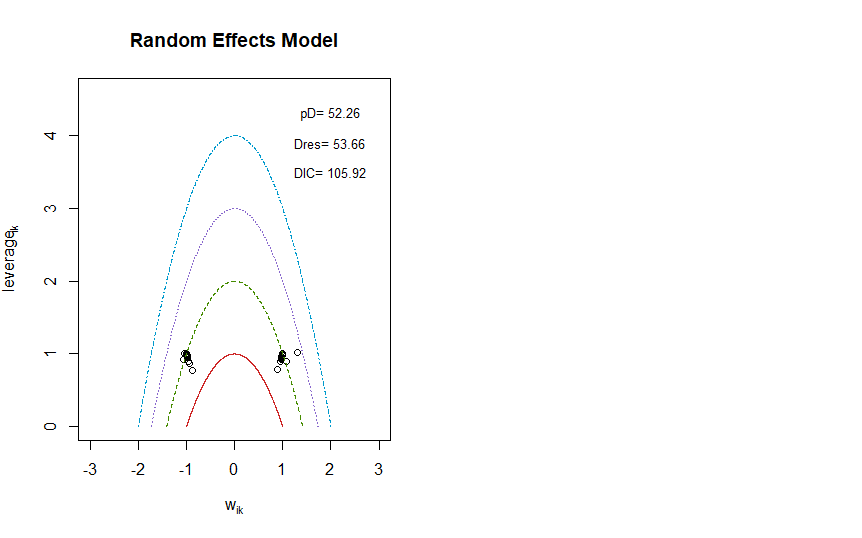


## Subgroup analysis of studies with vs without chest tube

No tube


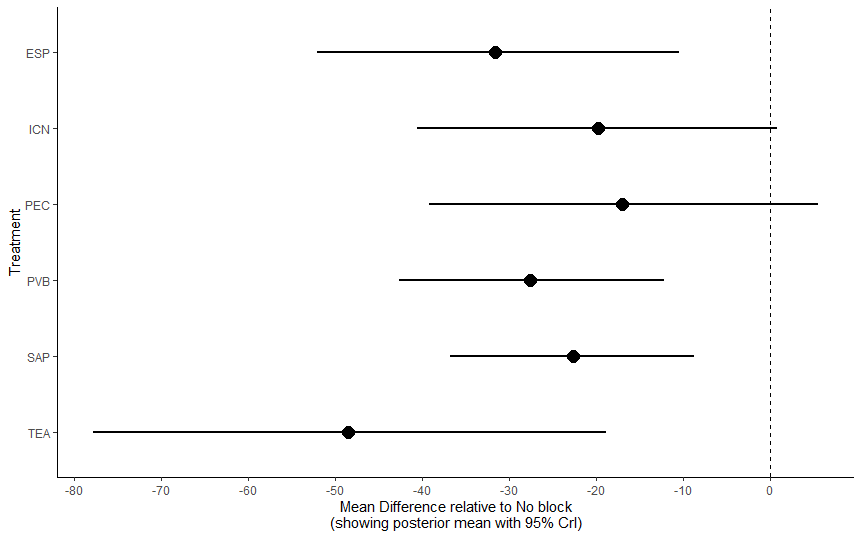


With chest tube
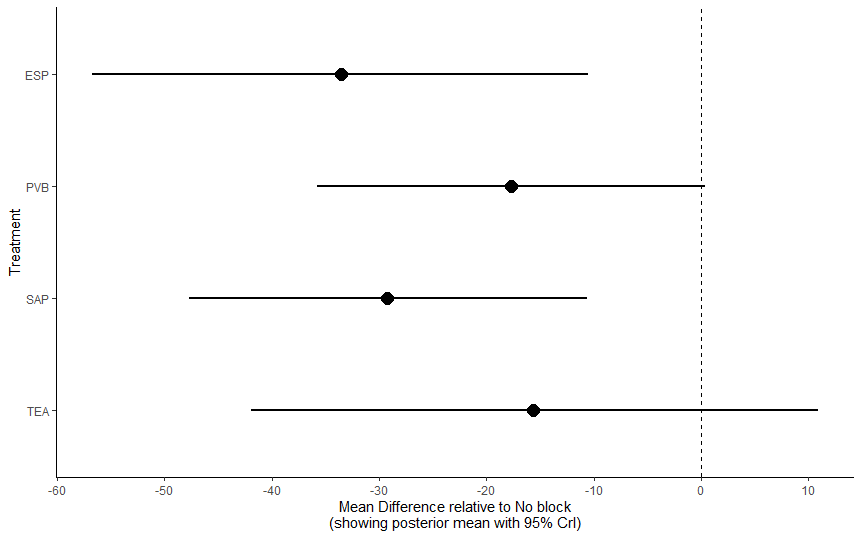


# 24-hour dynamic pain score AUC

## Network diagram for 24-hour dynamic pain score AUC comparisons


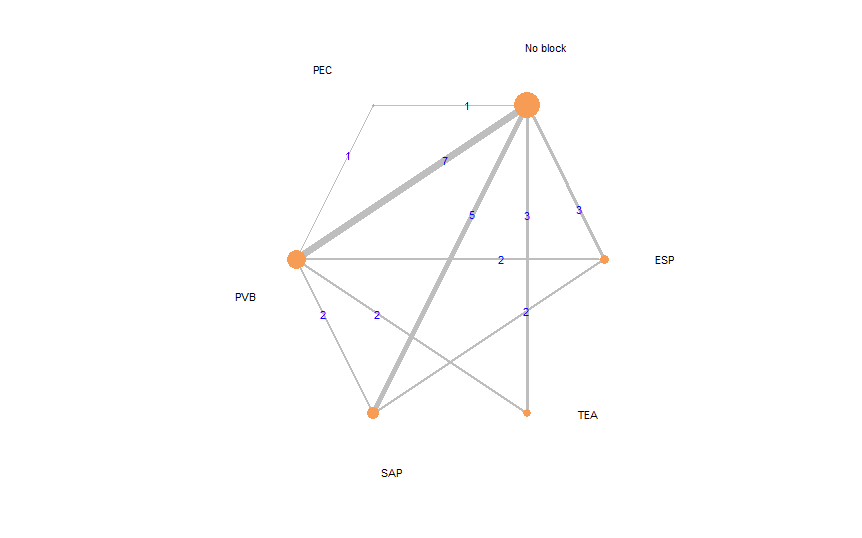


## Forest plot for 24-hour dynamic pain score comparisons between the pain interventions


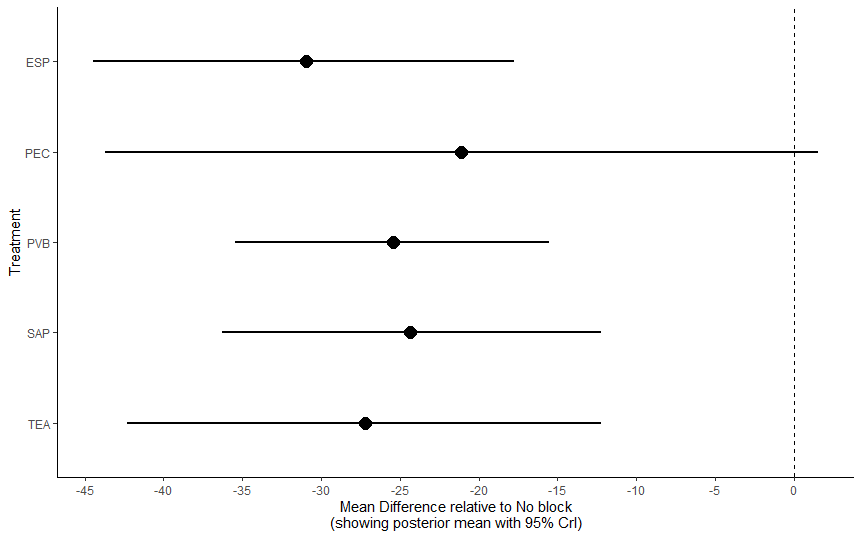


## League table for 24-hour dynamic pain score comparisons between the pain interventions


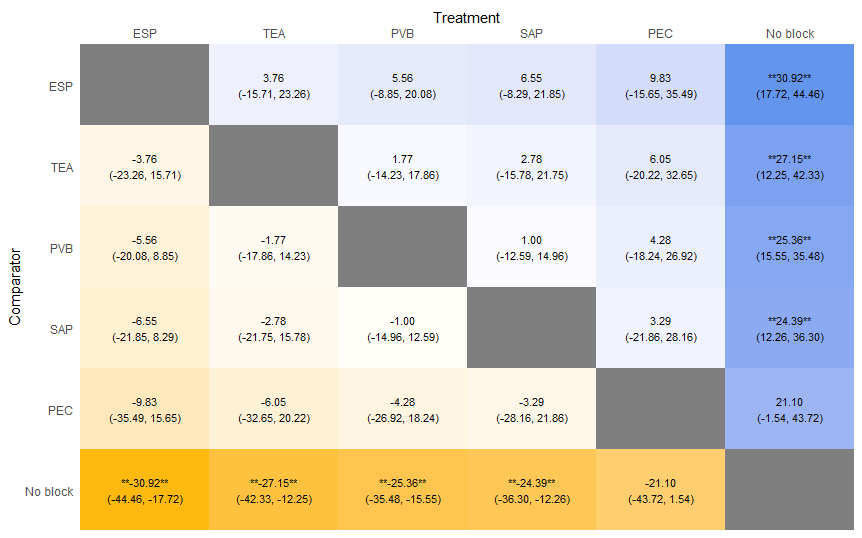


## Rankogram for 24-hour dynamic pain score comparisons between the pain interventions


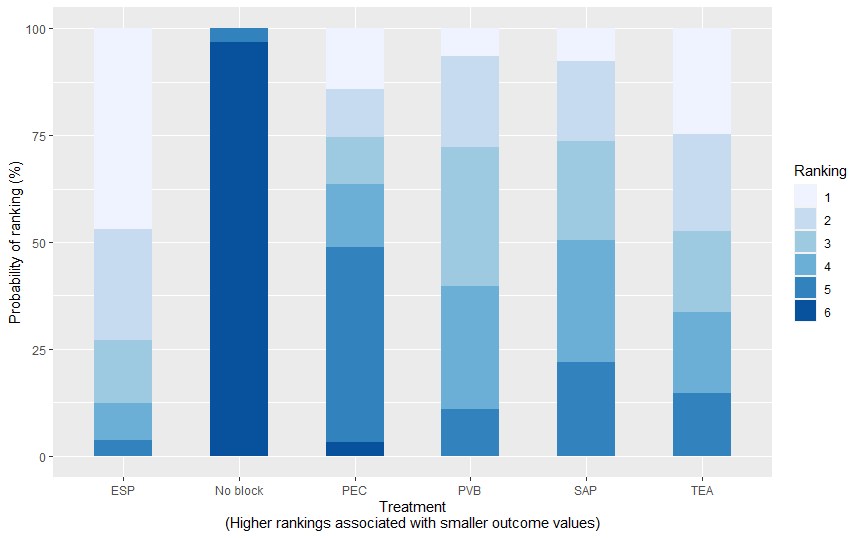


## SUCRA graph for 24-hour dynamic pain score comparisons between the pain interventions


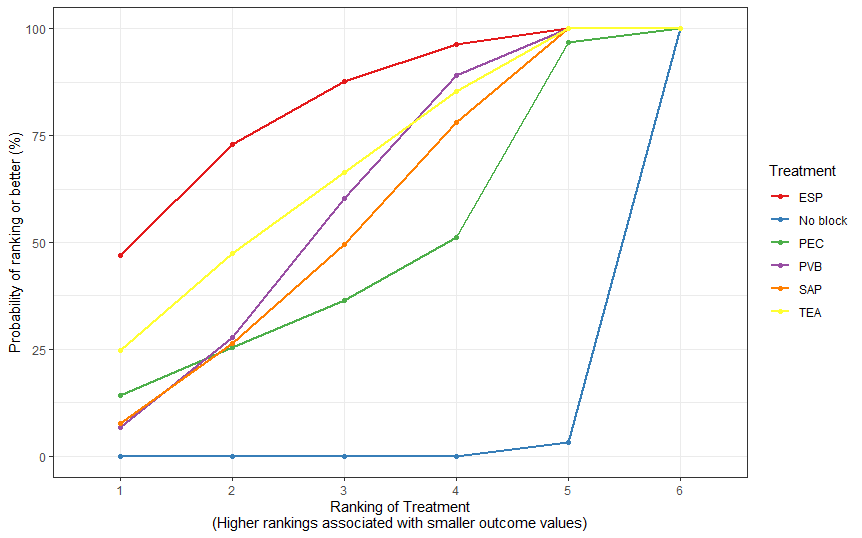


## Funnel plot for 24-hour dynamic pain score comparisons


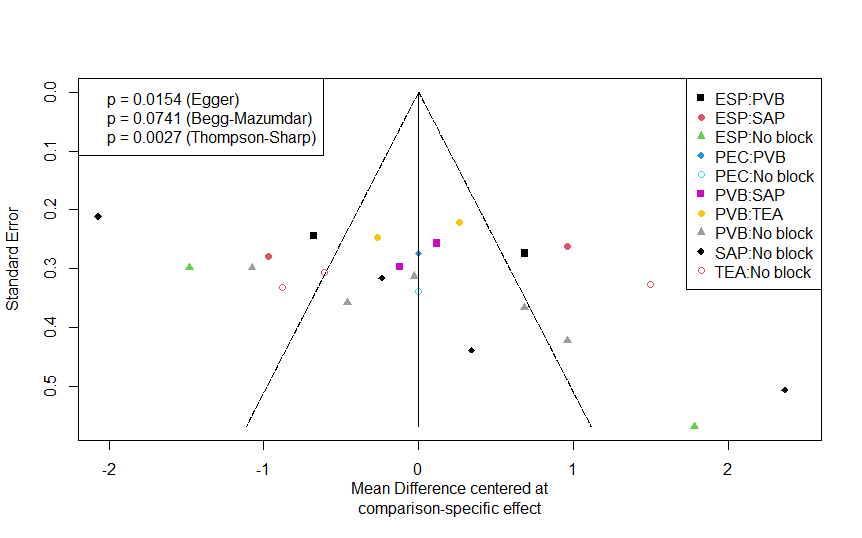


## Leverage plot for 24-hour dynamic pain score comparisons


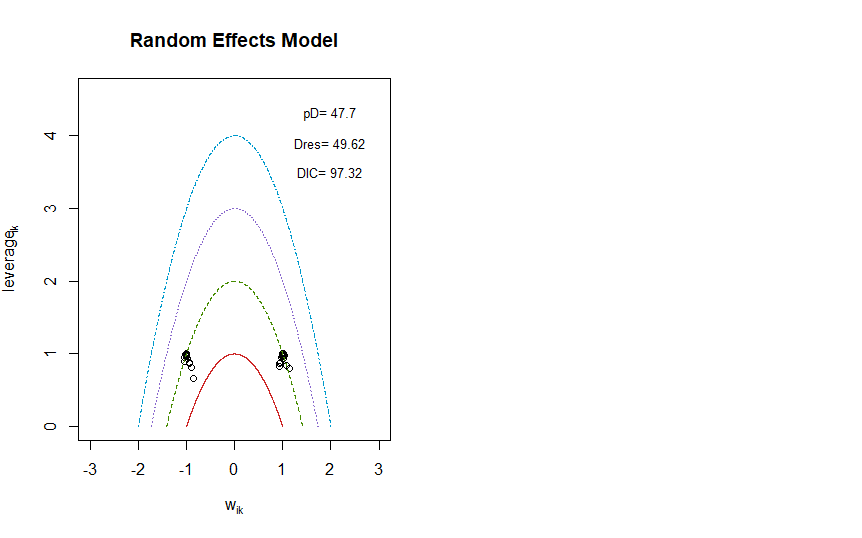


## Consistency plot for 24-hour dynamic pain score comparisons


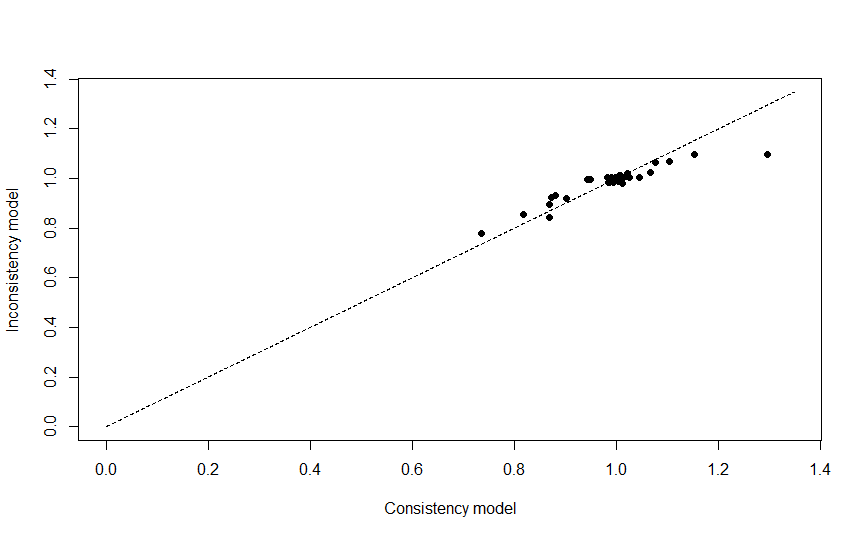


# Postoperative nausea and vomiting (PONV) risk

## Forest plot for PONV comparisons between the pain interventions


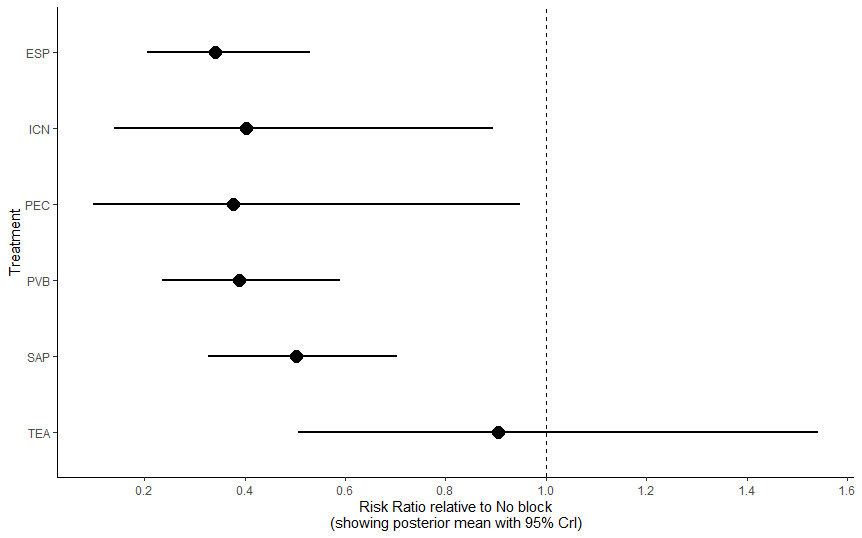


## Network diagram for PONV comparisons


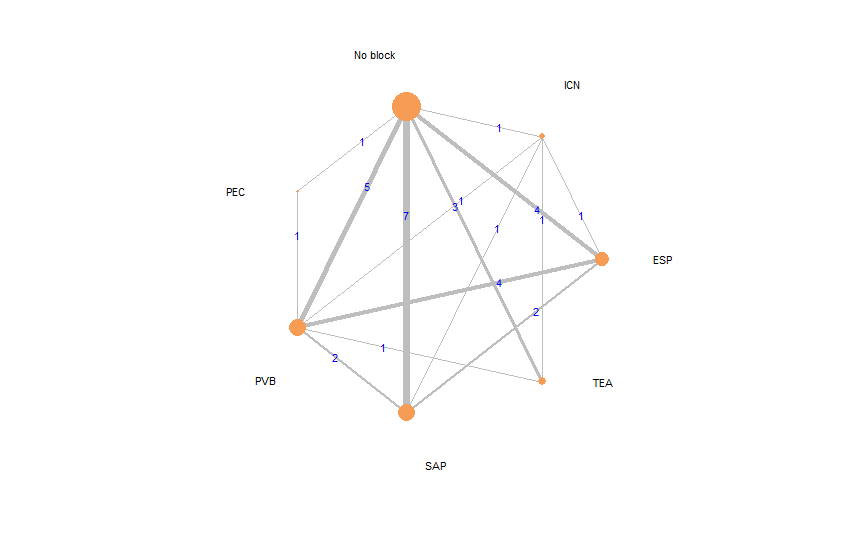


------

## Rankogram for PONV comparisons between the pain interventions


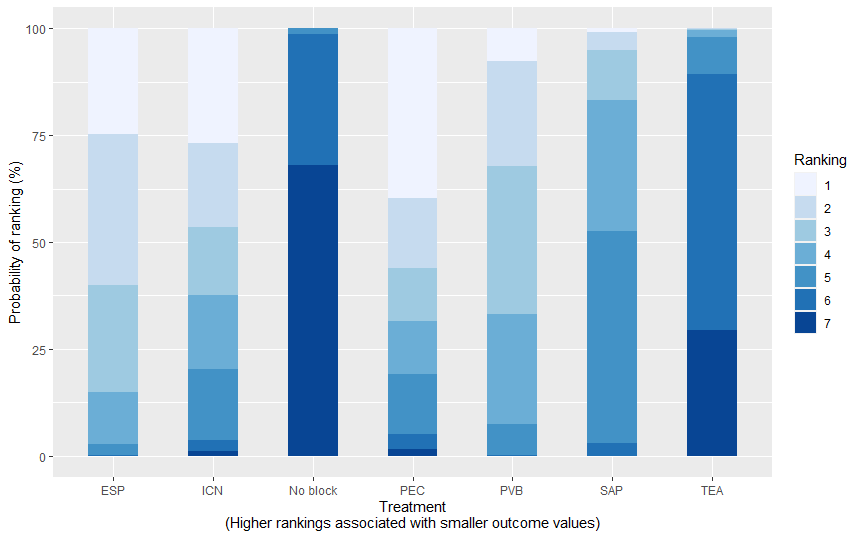


## SUCRA graph for PONV comparisons between the pain interventions


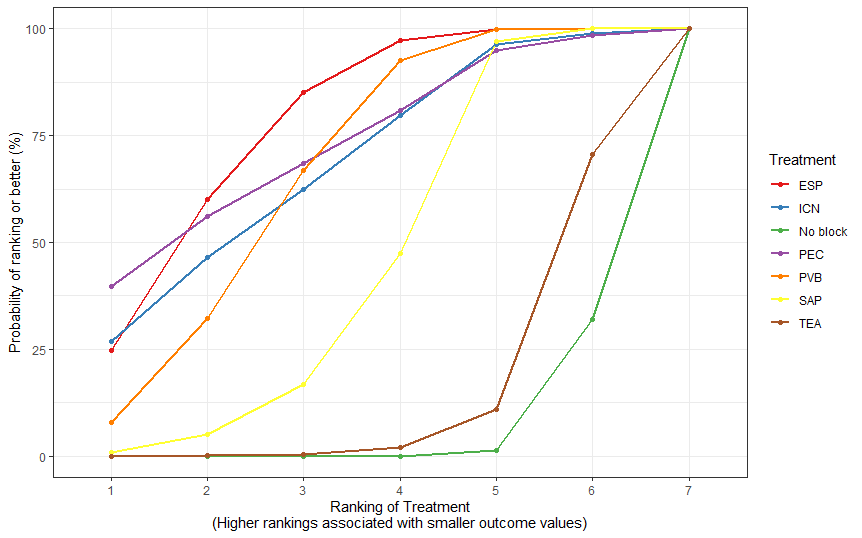


## League table of PONV comparisons between the pain interventions


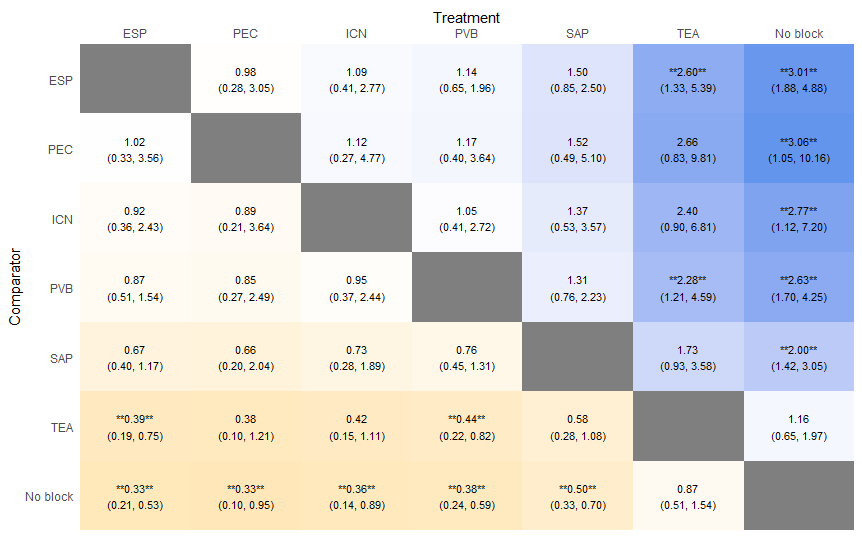


## Consistency plot for PONV comparisons between the pain interventions


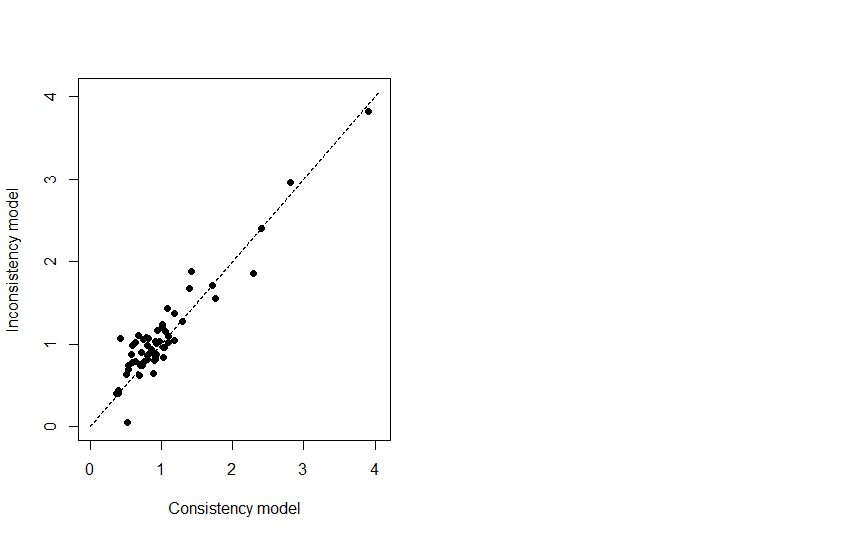


## Leverage plot for PONV


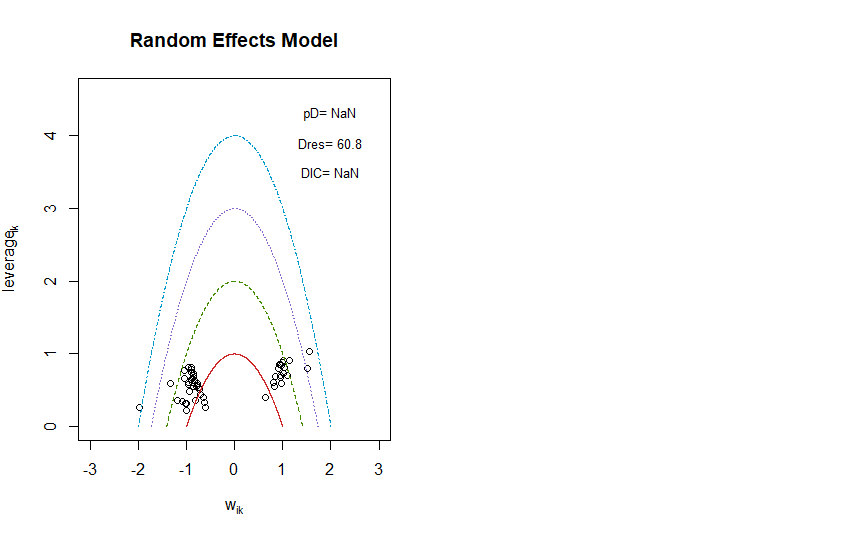


Funnel plot for PONV


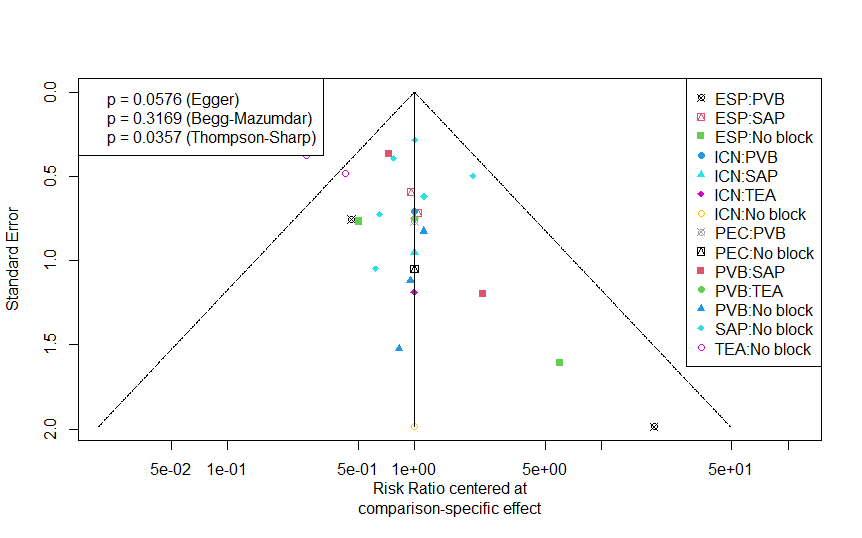


# Length of stay

## Network diagram for length of stay comparisons


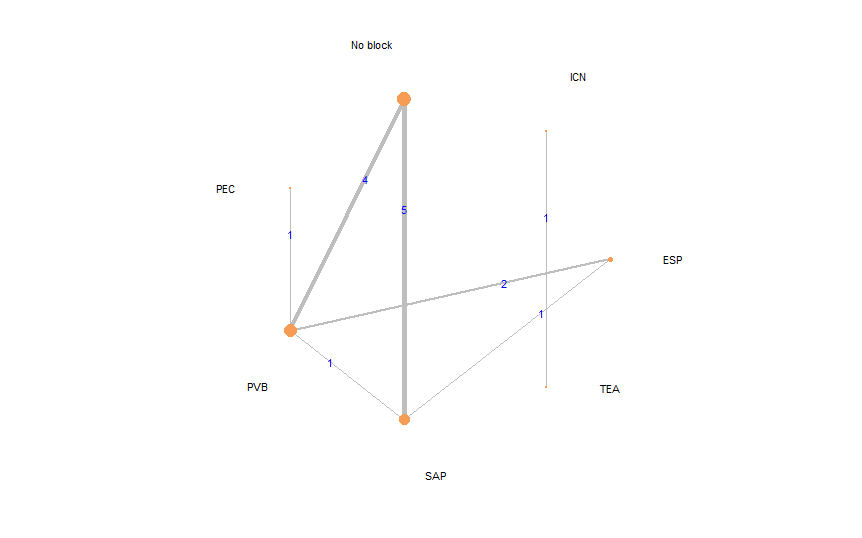


## Forest plot for length of stay comparisons between the pain interventions


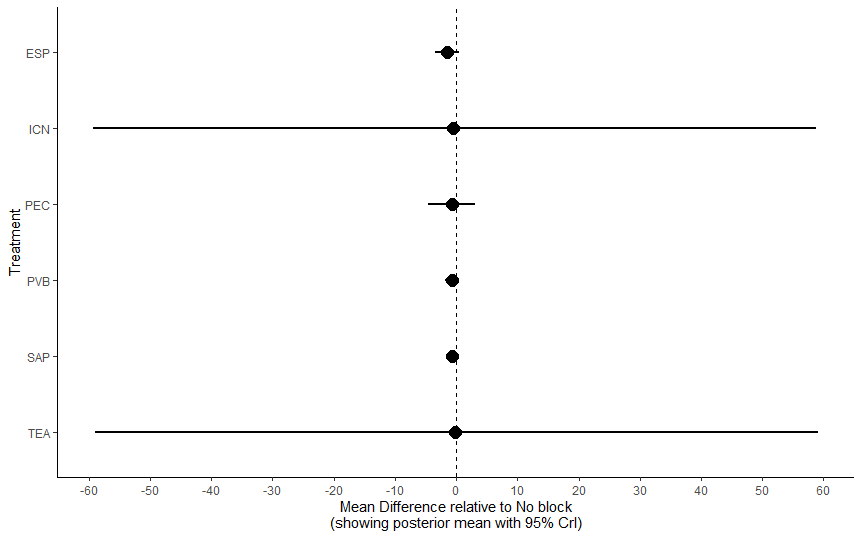


## SUCRA graph for length of stay comparisons between the pain interventions


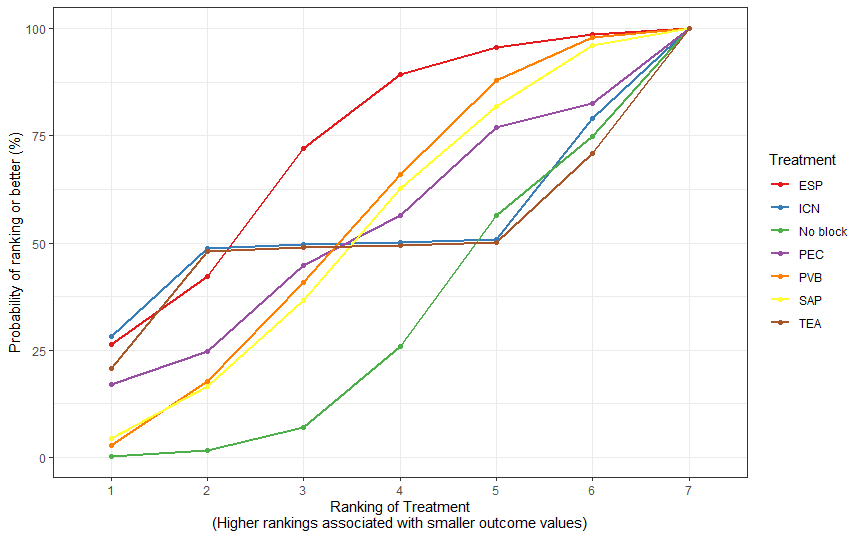


## League table for length of stay comparisons between the pain interventions


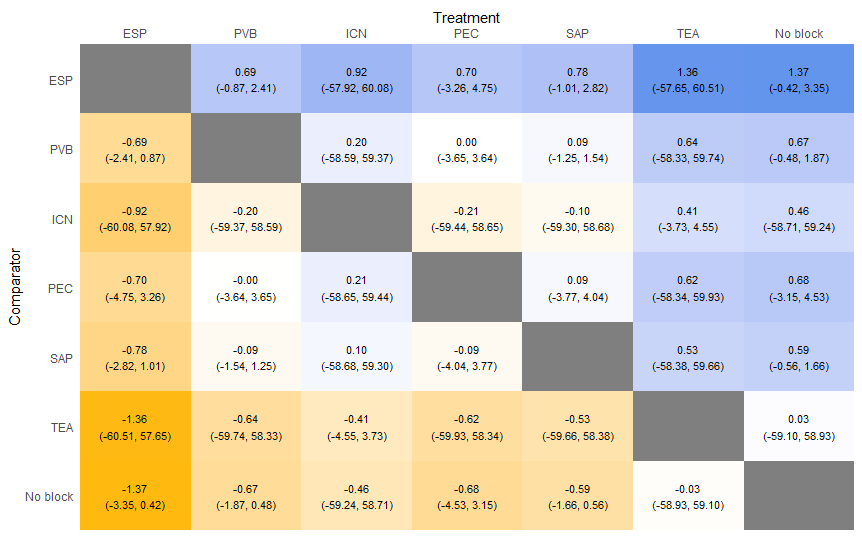


| **Table 2: GRADE summary of the secondary outcomes** | | | | | | |
| --- | --- | --- | --- | --- | --- | --- |
| **Outcomes** | **Effects and confidence in the estimate of effects (network meta‐analysis)** | | | | | |
| **ESP** | **TEA** | **SAP** | **PVB** | **ICN** | **PEC** |
| **24-hour dynamic pain score AUC**  Total studies: 24; total participants: 1,455; number of treatments: 6 (5 block techniques, placebo) | | | | | | |
| **Placebo** | **MD= 31,**  95% CI= 12 to 44  Rank 1 of 5 interventions | **MD= 27**  95% CI= 12 to 42  Rank 2 of 5 interventions | **MD= 24**  95% CI= 12 to 36  Rank 4 of 5 interventions | **MD= 25**  95% CI= 16 to 42  Rank 3 of 5 interventions | **No data available** | **MD= 21**  95% CI= -1.5 to 43  Rank 5 of 5 interventions |
| ⊕⊕⊖⊖ **Low**  Publication bias and heterogeneity | ⊕⊕⊖⊖ **Low**  Publication bias and heterogeneity | ⊕⊕⊖⊖ **Low**  Publication bias and heterogeneity | ⊕⊕⊖⊖ **Low**  Publication bias and heterogeneity |  | ⊕⊕⊖⊖ **Low**  Publication bias and heterogeneity |
| **PONV**  Total studies: 29; total participants: 1702; number of treatments: 7 (6 block techniques, placebo) | | | | | | |
| **Placebo** | **RR 0.33**  95% CI= 0.21 to 0.53  Rank 1 of 6 interventions | **RR 1.16**  95% CI= 0.65 to 1.97  Rank 6 of 6 interventions | **RR= 0.5, 95% CI=0.33 to 0.7**  Rank 5 of 6 interventions | **RR= 0.38, 95% CI=0.24 to 0.59**  Rank 4 of 6 interventions | **RR= 0.36, 95% CI=0.14 to 0.89**  Rank 3 of 6 interventions | **RR= 0.33, 95% CI=0.1 to 0.95**  Rank 2 of 6 interventions |
| ⊕⊕⊖⊖ **Low**  Publication bias and heterogeneity | ⊕⊕⊖⊖ **Low**  Publication bias and heterogeneity | ⊕⊕⊖⊖ **Low**  Publication bias and heterogeneity | ⊕⊕⊖⊖ **Low**  Publication bias and heterogeneity | ⊕⊕⊖⊖ **Low**  Publication bias and heterogeneity | ⊕⊕⊖⊖ **Low**  Publication bias and heterogeneity |
| **Length of stay**  Total studies: 15; total participants: 1039; number of treatments: 7 (6 block techniques, placebo) | | | | | | |
| **No significant difference seen between any arms** | | | | | | |
| AUC: area under the curve, CI: confidence interval, ESP: Erector Spinae Plane (block), ICN: Intercostal nerve (block), MD: mean difference, PEC: Pectoralis (block), PVB: Paravertebral Block, RR: risk ratio, SAP: Serratus Anterior Plane (block), TEA: Thoracic Epidural analgesia, | | | | | | |
